# 1 **Combinatorial neural inhibition for stimulus selection across space**

2  
3 Nagaraj R. Mahajan<sup>1</sup> and Shreesh P. Mysore<sup>2\*</sup>

4 <sup>1</sup>Department of Electrical and Computer Engineering, Johns Hopkins University

5 <sup>2</sup>Departments of Psychological and Brain Sciences, and Neuroscience, Johns Hopkins University

6 \*Correspondence to: [shreesh.mysore@jhu.edu](mailto:shreesh.mysore@jhu.edu)

7  
8 **The ability to select the most salient stimulus among competing ones is essential for animal**  
9 **behavior and operates regardless of the spatial locations that stimuli occupy. Here, we**  
10 **reveal that the brain employs a combinatorially optimized strategy to solve such location-**  
11 **invariant stimulus selection. With experiments in a key inhibitory nucleus in the vertebrate**  
12 **midbrain selection network, called isthmi pars magnocellularis (Imc) in owls, we**  
13 **discovered that the central element is a ‘multilobe’ neuron, which encodes visual locations**  
14 **with multiple firing fields. This multilobed coding of space is necessitated by scarcity of**  
15 **Imc neurons. Although distributed seemingly randomly in space, the locations of these**  
16 **lobes are optimized across the high firing Imc neurons, allowing them to cooperatively**  
17 **suppress stimuli throughout 2D visual space while minimizing metabolic and circuit wiring**  
18 **costs. Our work suggests that combinatorial coding of space by sparse inhibitory neurons**  
19 **may be a general functional module for spatial selection.**

20 Animals routinely encounter multiple competing pieces of information in their sensory  
21 environments. Typically, they handle this informational complexity by selecting the most salient  
22 or behaviorally relevant piece of information, i.e., highest ‘priority’ information, to guide their  
23 actions<sup>1-3</sup>. However, how neural circuits orchestrate the computations that are essential for such

24 stimulus selection is not well understood. Here, we unravel the neural basis of one such critical  
25 computation, namely, location-invariance. This property permits spatial selection to operate no  
26 matter which specific locations in the sensory world the competing stimuli occupy. Although  
27 appearing straightforward, the implementation of location-invariant stimulus selection requires  
28 comparisons between all possible pairs of stimulus locations and is computationally complex: the  
29 number of location-pairs at which two competing stimuli could be placed,  $L^2-L/2$ , scales  
30 quadratically with  $L$ , the number of spatial locations that are encoded. How does the brain meet  
31 the resulting demands imposed on neural circuitry and solve location-invariant stimulus  
32 selection?

33 A brain network with a well-established role in spatial target selection, and therefore, an  
34 excellent locus to study this question, is the midbrain selection network. It includes the  
35 sensorimotor hub, the superior colliculus (SC; or the optic tectum, OT, in birds), and a satellite  
36 inhibitory nucleus called the lateral tegmental nucleus<sup>4,5</sup>, or isthmi pars magnocellularis, Imc, in  
37 birds<sup>6,7</sup> (Supplementary Fig. 1a). The SC/OT, which encodes a topographic map of sensory (and  
38 motor) space<sup>8,9</sup>, plays a critical role in stimulus selection across spatial locations. Specifically,  
39 the intermediate and deep layers of the SC (SCid; called OTid in birds) are required for the  
40 selection of the highest priority stimulus among distracters independently of the spatial locations  
41 of these stimuli<sup>10,11</sup>. This location-invariant selection is expressed in the activity of SCid/OTid  
42 neurons as response suppression. When one stimulus is presented at any location, the responses  
43 of SCid/OTid neurons encoding that stimulus are suppressed by a competing stimulus presented  
44 anywhere outside the neurons' spatial receptive field (RF)<sup>12-14</sup>. Mechanistically, competitive  
45 suppression in the OTid is orchestrated by the GABAergic Imc through its specialized  
46 anatomical connectivity with the OT<sup>6,15,16</sup>. Each Imc neuron receives input from a restricted set

47 of neurons in layer 10 of the OT (OT<sub>10</sub>), but projects back broadly across the OTid space map  
48 sparing just those neurons that encode the input locations<sup>6</sup> (Supplementary Fig. 1b). This  
49 anatomy allows the Imc to implement a spatial inverse operation, distributing inhibition to all  
50 competing locations in the OTid space map (Supplementary Fig. 1c). The strength of competitive  
51 inhibition depends on the priority of the stimulus<sup>12-14</sup>, and, notably, inactivation of the Imc  
52 abolishes this competitive inhibition as well as spatial selection in the OTid<sup>15,16</sup>.

53 In this context, a conceptually straightforward strategy by which the Imc might achieve  
54 location-invariant selection in the OTid is illustrated in Supplementary Fig. 1d – a so-called  
55 ‘copy-and-paste’ strategy. Should the spatial RFs of Imc neurons be small, resembling those of  
56 the input OT<sub>10</sub> neurons, then simply repeating the Imc-OT circuit module that solves selection  
57 for one pair of locations across all location-pairs, would successfully implement location-  
58 invariant stimulus selection. However, the precise nature of the spatial RFs of Imc neurons is not  
59 well understood. In fact, the vertically large Imc RFs reported in previous work<sup>17,18</sup> lead to a  
60 computational paradox (Supplementary Fig. 1e). Here, we set out to investigate the functional  
61 properties of Imc neurons as well as the computations implemented by the Imc-OT network in  
62 the barn owl. In doing so, we discovered a combinatorially optimized strategy for location-  
63 invariant stimulus selection, one that is supported by unusual encoding of visual space by Imc.

64 **Spatial RFs of Imc neurons have multiple ‘lobes’.** We measured the visuospatial RFs of Imc  
65 neurons using extracellular recordings (Methods). Individual Imc units were identified by  
66 spikesorting single and multiunit data; only those units deemed to be of ‘high quality’ were  
67 included in the analysis (Methods). We found that individual Imc neurons possessed visual RFs  
68 with multiple, distinct firing fields or ‘lobes’ (Fig. 1a-h; Supplementary Fig. 2ab). The number of  
69 lobes in each RF was estimated in an unbiased manner using a two-step process (Methods): (i) a

70 nonlinear clustering method<sup>19</sup> to fit different numbers of clusters to the spatial map of firing rates  
71 followed by (ii) a model selection method<sup>20</sup> to robustly select the optimal number of clusters in  
72 the data (Fig. 1c, g, Supplementary Fig. 2c-f). We found that about two-thirds of Imc neurons  
73 had multilobed RFs (80/116; see also Fig. 1l).

74 To test if the multilobed structure of Imc RFs was an artifact of our experimental  
75 methods, we performed three controls. First, we tested if errors in spike sorting might have  
76 caused multiple units with single lobed RFs to be misidentified as a single unit with a multilobed  
77 RF. To this end, we applied an additional separability criterion to our sorted units. We tested the  
78 statistical separability of the waveforms of each sorted unit with those of any other unit as well  
79 as with outlier waveforms recorded at the same site, and retained only those units that were well-  
80 separated (Methods). We found that the majority of the sorted units (114/116) satisfied the  
81 separability criterion as well ( $p < 0.05$ ; Fig 1i), ruling out multiunit contamination as a source of  
82 error. Second, we examined if the spatial sampling resolution used for RF measurement, as well  
83 as neuronal response variability, might have caused the erroneous identification of single-lobed  
84 RFs as being multilobed (Supplementary Fig. 2g). Using experimentally grounded simulations,  
85 we mapped out the values of sampling step-size and response Fano-factor that yielded a  
86 multilobe misidentification rate of 5% or greater (Fig. 1j; red zone<sup>20</sup>; Methods). We found that  
87 the values of these parameters for each recorded unit fell outside the 5% misidentification zone.  
88 As a final control, because it is well established that OT RFs have single spatial firing fields, we  
89 measured visual RFs of OT neurons. Our methods correctly identified all of the measured OT  
90 RFs as being single-lobed (Fig. 1k; Supplementary Fig. 2h). Together, these results confirmed  
91 the veracity of our conclusion that the Imc contains predominantly ‘multilobe’ neurons (68%;  
92 78/114; Fig. 1l).

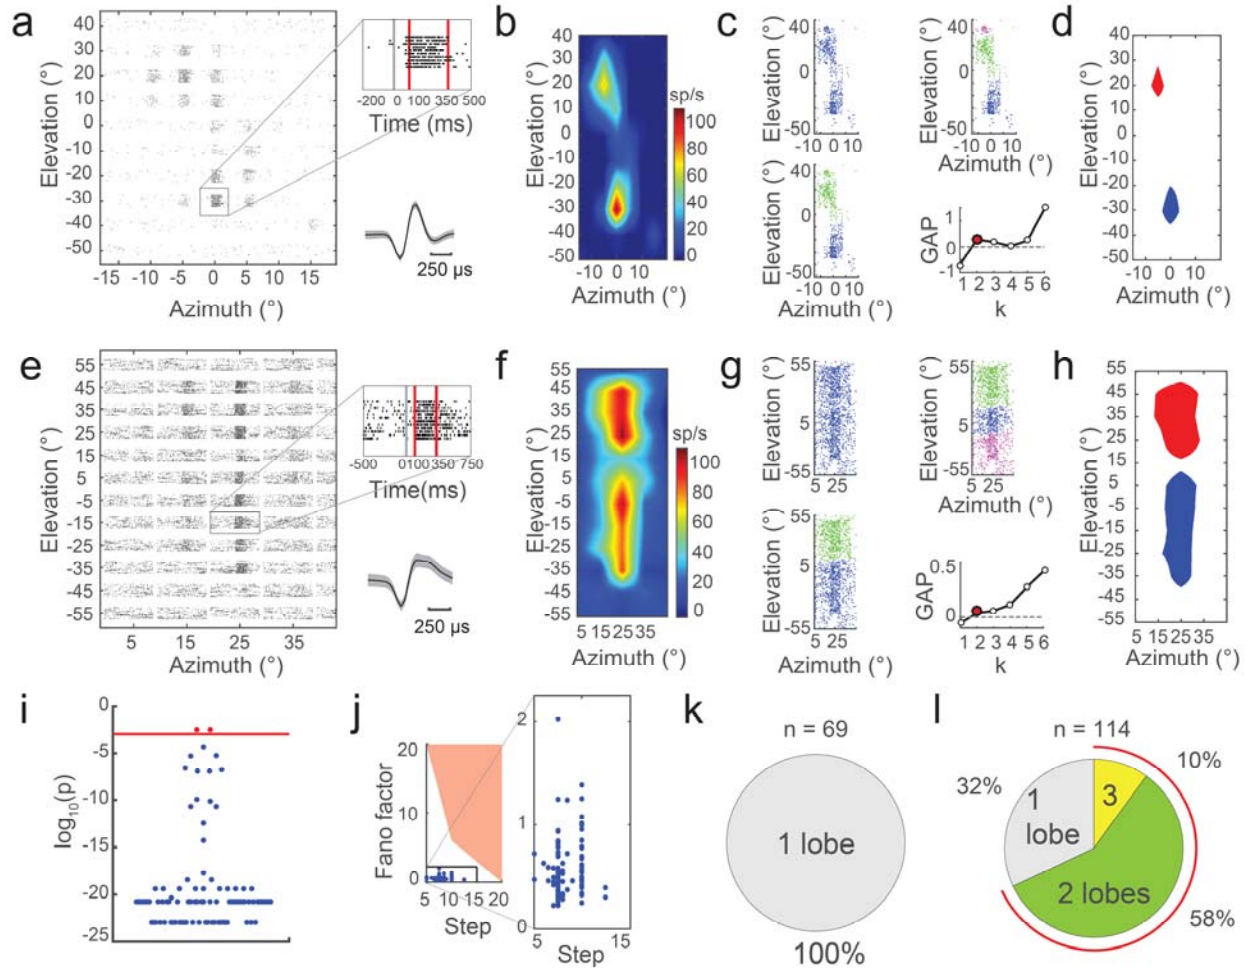

93

94 **Fig. 1. Visual receptive fields (RFs) of Imc neurons have multiple distinct firing fields ('lobes').** (a)

95 2-D visual RF of Imc neuron: raster plot of neuron's responses to visual stimulus presented at different

96 spatial locations. *Inset-top*: Gray line – stimulus onset; red lines – time window used to calculate firing

97 rate; evoked firing rates in Imc were high (median = 76.5 Hz; n=114 neurons). *Inset-bottom*: Average

98 spike waveform for neuron in **a**; identified as high-quality unit (Methods); mean (black) ± S.D (gray). (b)

99 Color coded firing rate map corresponding to **a**. (c) Rate map in **b** re-plotted as distribution of points in a

100 2-D plane and subjected to spatial clustering (Methods). Shown are the best single (*top-left*), best two

101 (*top-right*), and best three clusters (*bottom-left*) fitted to the data using the density peaks clustering

102 method<sup>19</sup> (Supplementary Fig. 2c; Methods). *Bottom-right*: Plot of GAP statistic, a robust model selection

103 metric, against the number (*k*) of clusters fitted to data<sup>20</sup> (Methods). Red point: statistically optimal

104 number of clusters ( $k^*$ ), identified as the smallest  $k$  for which GAP exceeds zero; here  $k^* = 2$  (Methods)  
105 <sup>20</sup>. **(d)** Half-max extents of these two optimal RF clusters (lobes). **(e-h)** Same as **a-d**, but for a different  
106 Imc neuron. **(i)** Plot of p-values (logarithmic scale) obtained from separability testing for each sorted unit;  
107 one-way ANOVA followed by correction for multiple comparisons (Methods). P-value <0.05 (blue data):  
108 units that are deemed ‘well-separated’ from co-recorded units as well as outliers (n=114). Red data: units  
109 not well separated from cohort. **(j)** Effect of neuronal response variability and spatial sampling step-size  
110 on number of RF lobes detected in a simulated single-lobed Gaussian RF; Monte-Carlo analysis  
111 (Supplementary Fig. 2g; Methods). Red area: Fano-factor and step-size pairs yielding >5% rate of  
112 misidentifying single-lobed RF as multilobed. Blue data: Experimentally recorded Imc neurons (n = 114).  
113 **(k)** Summary of number of RF lobes across 69 OT neurons. See also Supplementary Figs. 1 and 2. **(l)**  
114 Summary of number of RF lobes across 114 Imc neurons.

115 **RF lobes are distributed along the elevation, but not azimuth.** To investigate organizing  
116 principles underlying spatial encoding by Imc neurons, we analyzed the properties of the  
117 measured visual RFs along the two major anatomical axes of the Imc (Supplementary Fig. 1a).  
118 The azimuthal centers of RF lobes were nearly identical for lobes within individual multilobe  
119 neurons (Fig. 2a, blue data; Methods), across neurons recorded at a given site (Fig. 2b, blue  
120 data), and across sites recorded along the dorsoventral axis of the Imc (Fig. 2c; Methods).  
121 However, azimuthal encoding varied systematically along the rostrocaudal axis of the Imc:  
122 centers of RF lobes encoded progressively more peripheral azimuths as the recording electrode  
123 was moved from rostral to caudal portions of the Imc (Fig. 2d <sup>17,18</sup>).

124 The encoding of elevation by Imc neurons was strikingly different. RF lobes of individual  
125 multilobe neurons were spaced arbitrarily in elevation (Fig. 2a: large range of red data).  
126 Additionally, RF lobes of multilobe Imc neurons were distributed widely across elevational

127 space: for each multilobe neuron (Fig. 2a, inset: large median of data), across neurons recorded  
 128 at a given site (Fig. 2b, red), and across sites recorded along both dorsoventral and rostrocaudal  
 129 axes (Supplementary Fig. 3a-d). There was also no systematic relationship between encoded  
 130 elevations and distance along either principal axis (Supplementary Fig. 3ab).

131 These results demonstrated that whereas azimuthal space is encoded in a topographic  
 132 manner along the rostrocaudal extent of the Imc, elevational space is encoded by multiple,  
 133 arbitrarily spaced, and widely distributed lobes of varying number and size (Supplementary Fig.  
 134 3e-j), with a maximum of three RF lobes per neuron (Fig. 1i).

135 **Fig. 2. RF lobes of multilobe Imc neurons are distributed along elevation but not azimuth, and RFs**  
 136 **are organized topographically in azimuth, but not elevation. (a)** Histograms of pairwise distances

137 between centers of RF lobes of individual  
 138 multilobe neurons (Methods). Blue: azimuthal  
 139 distance; red: elevational distance; marked  
 140 range: 5<sup>th</sup> to 95<sup>th</sup> percentile range of red data.

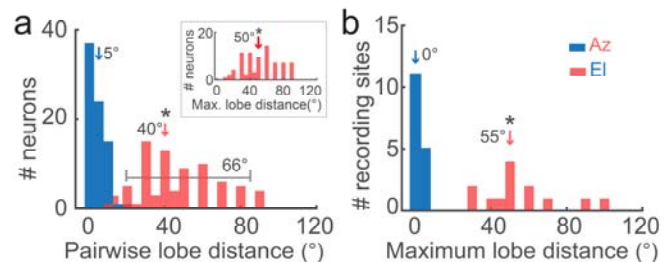

141 Arrows: median values; \*: median  
 142 significantly different from 0 ( $p = 0.17$ ,  
 143 azimuth;  $p < 0.05$ , elevation; one-tailed  
 144 ranksum tests). *Inset*: Histogram of maximum  
 145 elevational distance between centers of RF

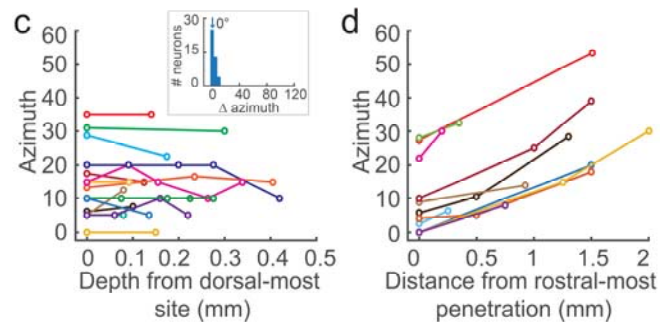

146 lobes of individual multilobe neurons ( $p < 0.05$ , one-tailed ranksum test). **(b)** Histograms of maximum  
 147 distances between centers of RF lobes of multilobe neurons sorted from individual recording sites  
 148 (Methods); conventions as in **a**;  $p = 0.65$  for azimuth; one-tailed ranksum test,  $p < 0.05$  for elevation; one  
 149 tailed t-test. **(c)** Plot of average azimuthal center of a recording site against the dorsoventral position of  
 150 the site within the Imc (Methods); colors: different penetrations. *Inset*: Data re-plotted as histogram of

151 pairwise differences in the azimuthal centers of recording sites along a dorsoventral penetration ( $p=0.18$ ,  
152 one-tailed ranscum test). **(d)** Plot of average azimuthal ‘center’ of a dorsoventral penetration against the  
153 rostrocaudal position of electrode in the Imc in that recording session (Methods). Colors: different  
154 recording sessions; Spearman correlation =1 in each case. See also Supplementary Fig. 3

155 **Neuronal scarcity necessitates multiple RF lobes.** The multilobed encoding of (elevational)  
156 space by Imc neurons was puzzling. This was especially so because neurons that provide input to  
157 the Imc ( $OT_{10}$ ), as well those that receive Imc’s output ( $OTid$ ), all tile sensory space with single-  
158 lobed spatial RFs organized topographically in both elevation and azimuth (Fig. 1m)<sup>8</sup>. Might the  
159 implementation of stimulus selection across space, a main function of the Imc<sup>16</sup>, impose any  
160 demands on its spatial coding properties? We turned to theory to examine the implications,  
161 specifically, of the need for location-invariant stimulus selection on Imc RF structure (Methods).  
162 Briefly, we compared the total number of location-pairs at which selection must occur in the  
163  $OTid$ , with the number of location-pairs in the  $OTid$  at which selection is achievable by a set of  
164 Imc neurons. Since multilobed Imc encoding is restricted along the elevation (Fig. 2ab;  
165 Supplementary Fig. 3a-d), we focused on stimulus selection between all possible pairs of  
166 elevations at any azimuth. We proved mathematically that if the number of Imc neurons ( $N$ )  
167 encoding different elevations at a given azimuth is less than the number of distinct elevational  
168 locations ( $L$ ) encoded by the  $OTid$  at that azimuth ( $N < L$ ), then multilobed Imc RFs are necessary  
169 for location-invariant stimulus selection (Methods).

170 To examine the biological applicability of this insight, we estimated  $L$  and  $N$  in the owl  
171 brain. For a given azimuth, the  $OTid$  encodes elevations ranging typically from  $-60^\circ$  to  $+60^\circ$  and  
172 does so at a spatial resolution of at least  $3^\circ$ <sup>8,12</sup>. Consequently, the number of distinct elevational  
173 locations encoded by the  $OTid$  at a given azimuth is at least 40 ( $L_{el} > 40$ ). Next, we estimated  $N_{el}$ .



174 Because visual azimuth is organized topographically along Imc's rostrocaudal axis (Fig. 2d),  
175 transverse sections of the Imc provide snapshots of Imc tissue encoding all elevations at a given  
176 azimuth (Fig. 3ab). We obtained histological sections perpendicular to the rostrocaudal axis of  
177 the Imc and performed Nissl staining to visualize cell bodies (Methods). Counts of the number of  
178 Nissl-stained somata<sup>21</sup> showed that the majority of sections (75%) had fewer than 28 neurons per  
179 section ( $N_{el}$ ; Fig. 3bc). Thus,  $N_{el}$  is typically much smaller than  $L_{el}$  (median  $N_{el} / L_{el} < 26/40 =$   
180  $0.65$ ). In contrast, along the azimuth, there are at least as many Imc neurons as there are encoded  
181 azimuthal locations;  $N_{az} \geq L_{az}$  (Methods).

182 These results indicated that multilobed encoding in the Imc may be driven by the need for  
183 the Imc-OT circuit to achieve location-invariant  
184 stimulus selection along elevation in the face of  
185 a paucity of Imc neurons encoding elevation  
186 (Fig. 3bc).

187 **Fig. 3. Imc encodes elevations with a sparse**  
188 **number of neurons.** (a) Coronal section of owl  
189 midbrain showing Imc and OT. (b) Zoomed-in  
190 image showing individual, Nissl-stained, Imc somata  
191 (arrowheads); 23 somata in this section. (c) violin

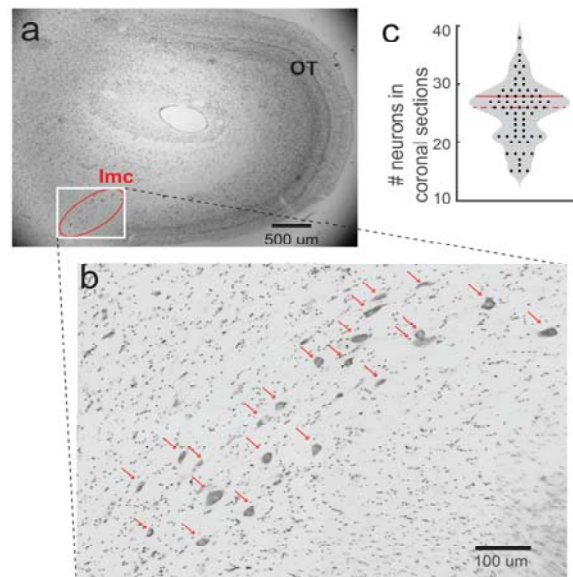

192 plot showing number of Imc somata per coronal section; each dot – one section;  $n=64$  sections across two  
193 owls. Dashed line: median (26 neurons); solid line: 75<sup>th</sup> percentile (28 neurons).

194 **Model predicts combinatorially optimized inhibition for location-invariant selection.** To  
195 explore how an under-complete set of Imc neurons might implement location invariant selection,  
196 we turned to computational modeling. We set up stimulus selection across spatial locations as an

197 optimization problem with  $L$  locations (elevations at a given azimuth), and  $N$  model neurons  
198 encoding those elevations ( $N < L$ ; Supplementary Fig. 4; Methods). We imbued all model neurons  
199 with Imc-like spatially inverting connectivity with the OT (Supplementary Figs. 1 and 4). The  
200 spatial RFs of these model Imc neurons were represented, for simplicity, using ones and zeros,  
201 with ones corresponding to locations inside the RF, and zeros, outside (Fig. 4A; also see  
202 Supplementary Fig. 4 for validity of model even when this assumption is relaxed). The goal of  
203 the optimization was to identify the spatial RF structures of these  $N$  neurons (i.e., the numbers of  
204 their RF lobes and their spatial locations), such that when two stimuli of equal priority are placed  
205 at any pair of locations, they suppress each other equally. This necessary and sufficient condition  
206 for location-invariant selection was captured by a specially constructed cost function whose  
207 value decreased as the number of location-pairs at which the above condition was satisfied  
208 increased. The cost function took the minimum possible value of  $-L(L-1)$  if and only if the  
209 condition was satisfied at all location-pairs (Methods). Any set of Imc RFs that achieved this  
210 minimum value, i.e., that achieved location invariant selection, was called an ‘optimal solution’.  
211 To match experimental observations (Fig. 1i), we added the constraint that the maximum number  
212 of RF lobes allowed for each neuron ( $k_{max}$ ) was three.

213 An optimal solution for  $L=5$  locations with  $N=4$  neurons illustrates how fewer than  $L$   
214 inhibitory neurons can successfully achieve location-invariant selection (Fig. 4a-c; see also  
215 Supplementary Fig. 5ab for example optimal solutions for  $L=20$  and  $L=40$  locations). Repeated  
216 optimization runs (1000 runs) for  $L=5$  locations and  $N$  ranging from 1 to 5 indicated that the  
217 smallest number of neurons with which location-invariant selection could be achieved by the  
218 model, called  $N^*$ , was 4 (Supplementary Fig. 5c; Methods). Therefore, the maximum ‘savings’  
219 in the number of Imc-like neurons for  $L=5$  locations was 1 ( $L-N^*$ ). Notably, however, as  $L$

220 increased, neuronal savings increased (Fig. 4d), with  $L=40$  requiring  $N^*=27$  neurons to solve  
221 location-invariant selection (savings of 13 neurons = 32%; Supplementary Fig. 5b). In addition,  
222 neuronal savings also increased as a function of the maximum number of RF lobes allowed per  
223 neuron (Fig. 4d).

224 Further examination of optimal model solutions for all runs of all ( $L, N^*, k_{\max}$ ) values  
225 tested revealed three signature properties that held true in every case. First, every optimal  
226 solution contained multilobe Imc neurons (Fig. 4a and Supplementary Fig. 5d). Conceptually,  
227 this ‘multilobe property’ is necessary because of the paucity of neurons, i.e., the  $N < L$  constraint,  
228 as demonstrated by theory (Methods). Second, every multilobe neuron in an optimal solution  
229 shared each of its lobes, but not all, with another neuron (Fig. 4e and Supplementary Fig. 5e) – a  
230 severe constraint on the relative organization of RF lobes across neurons, one that imposes  
231 structured non-orthogonality on the RFs. Conceptually, this ‘optimized lobe-overlap property’ is  
232 necessary because selection needs to be solved also when two stimuli are placed at the locations  
233 encoded by different lobes of an individual multilobe neuron (Supplementary Fig. 5f). Third,  
234 neurons in optimal solutions used a combinatorial inhibition strategy to achieve location-  
235 invariant stimulus selection: assorted subsets of neurons were selectively recruited to solve  
236 stimulus selection for individual location-pairs, with the subsets corresponding to different  
237 location-pairs intersecting extensively. The assorted nature of the subsets was evident in the  
238 observation that ‘distant’ neurons were recruited to solve selection between even nearby  
239 locations, and vice-versa (Fig. 4f) – features that held true across all permutations of the ordering  
240 of the neurons in the solution set (Supplementary Fig. 5gh). The extensive intersection feature  
241 was evident in the observation that the neural subsets recruited to solve selection even for  
242 location-pairs occupying distant portions of space shared common neurons (Fig. 4g;

243 Supplementary Fig. 5i). Conceptually, this ‘combinatorial property’ is a consequence of the RF  
 244 lobes of individual multilobe neurons being widely distributed and arbitrarily spaced in optimal  
 245 model solutions (Supplementary Fig. 5j and 6bd): restricting RF lobes to only nearby locations  
 246 substantially limits the space of available RF configurations, precluding optimal solutions.

247 Taken together, the model predicted that the solution of location-invariant selection when

248  $N < L$  necessitated combinatorially  
 249 optimized coding by sparse, multilobe  
 250 inhibitory neurons (COSMI). In contrast,  
 251 when  $N \geq L$ , as is the case with *Imc*’s  
 252 azimuthal encoding, the model was always  
 253 able to solve location invariant selection  
 254 with single-lobed neurons (Fig. 4d,  $k_{max}=1$ ,  
 255 blue data), using the straightforward copy-  
 256 and-paste strategy (Supplementary Fig.  
 257 1d).

258 **Fig. 4. Model predicts combinatorially**  
 259 **optimized solution for location-invariant**  
 260 **stimulus selection when neurons are scarce.**

261 (a-c) Illustration of location-invariant  
 262 selection by an optimal model solution for

263  $L=5$  locations (*a-e*) and  $N=4$  neurons (#1-#4). (a) The four RFs in the optimal solution. Shaded areas: RF  
 264 of neuron; two neurons have multilobed RFs (#1 – two lobes, #3 – 3 lobes). (b) Optimal solution in **a**  
 265 implements selection between stimuli  $S_a$  and  $S_b$  at location-pair *ab* (extreme left).  $S_a$  and  $S_b$  are of equal  
 266 priority (1 unit for simplicity). Top row: Information flow through the model  $OT_{10}$ -*Imc*- $OTid$  circuit

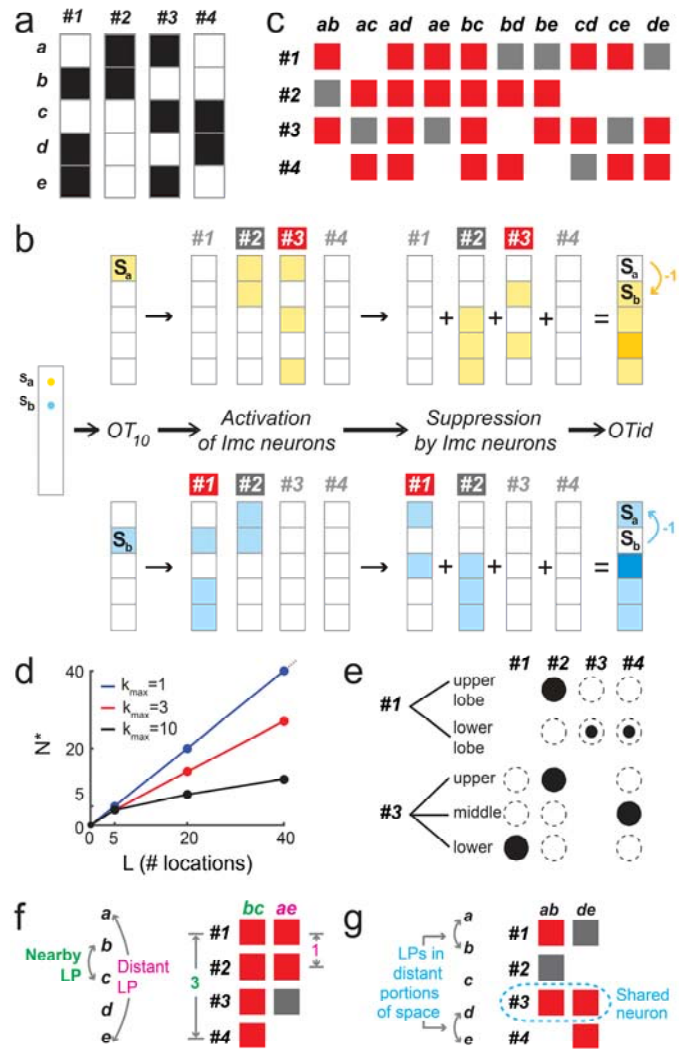

267 triggered by  $S_a$ . *1<sup>st</sup> column*: Activation of OT<sub>10</sub> space map. *2<sup>nd</sup> column*: Activation of individual Imc  
268 neurons. *3<sup>rd</sup> column*: Suppression pattern generated by each activated Imc neuron (spatial inverse of the  
269 neuron's RF; consistent with published anatomical results; Supplementary Fig. 1b-e <sup>6</sup>). *4<sup>th</sup> column*:  
270 Combined pattern of suppression in the OTid. Dark colors: 2 units of suppression; light colors: 1 unit  
271 (Methods). Curved arrow: Net suppression driven by  $S_a$  location b. Dark-gray shading: 'Activated'  
272 neuron (#2); defined as a neuron driven by  $S_a$  but that does not send inhibition to location b. Red shading:  
273 'Recruited' neuron (#3); defined as activated neuron that sends inhibition to location b, thereby involved  
274 in selection for location-pair *ab*. *Bottom row*: Same as top row, but for stimulus  $S_b$ . (c) Selection matrix  
275 summarizing implementation of selection for all location pairs by optimal model solution in **a**. Columns:  
276 10 possible location-pairs; rows: the four neurons. In each column: dark-gray – activated neurons, red –  
277 recruited neurons, blank – neurons not activated by either stimulus. (**d**) Summary plot showing the  
278 fewest number of neurons ( $N^*$ ) needed by model to solve location-invariant selection for different  
279 numbers of locations ( $L$ ) (Supplementary Fig. 5c; Methods).  $k_{max}$ : maximum number of RF lobes allowed  
280 for each neuron (Methods). (**e-g**) Illustration of signature properties for combinatorially optimized  
281 inhibition exhibited by optimal model solution in **a**. (e) Signature property #2 (optimized lobe-overlap;  
282 see text). *Top row*: multilobe neuron #1 in A shares upper, but not lower lobe with neuron #2, and shares  
283 lower, but not upper lobe with neurons #3 and #4. *Bottom row*: Similar, but for multilobe neuron #3 (see  
284 also Supplementary Fig. 5e). (f, g) Signature property #3 (combinatorial inhibition; see text). *Left panels*:  
285 Locations *a-e*. *Right panels*: Patterns of neurons activated and recruited to solve selection for indicated  
286 location-pairs (LPs); extracted from selection matrix in **c**. 'Assortedness' feature: location-pair *bc*  
287 involves nearby locations (f, left panel), but recruits distant neurons to solve selection (f, right panel; #1  
288 and #4; distance =3; Methods); conversely, distant location-pair *ae* recruits nearby neurons (#1 and #2;  
289 distance =1. This holds across all permutations of neuronal ordering (Supplementary Fig. 5gh; Methods).  
290 Extensive intersection feature: location-pairs occupying distant portions of space (g, left panel) recruit  
291 intersecting neural subsets to solve selection (g, right panel; see also Supplementary Fig. 5i; Methods).  
292 See also Supplementary Fig. 4, 5 and 6.

293 **Experimental validation of model predictions in Imc.** To examine if the owl Imc might  
294 employ a combinatorially optimized strategy for location-invariant selection in elevation, we  
295 tested experimentally whether the RFs of Imc neurons exhibited the three signature properties  
296 predicted by the model. Because all elevations at a given azimuth are encoded by neurons within  
297 a coronal plane (Fig. 2bc), we sampled these neurons by making recordings at multiple  
298 dorsoventral sites within each coronal plane (Methods).

299         Across recordings made in 16 such coronal planes, we found that multilobe neurons were  
300 present in nearly every case (14/16; Fig. 5a; also Supplementary Fig. 3a), thereby validating the  
301 signature property #1. The impracticability of recording exhaustively from all Imc neurons in a  
302 coronal plane made it infeasible to test if *every lobe* of each multilobe neuron satisfied the  
303 optimized lobe-overlap property (signature property #2; Fig. 4e). Therefore, we tested if *at least*  
304 *one lobe* of each multilobe neuron satisfied it (Fig. 5b; Methods). The median fraction of  
305 multilobe neurons in each coronal plane that satisfied this property was 1 (Fig. 5c). Finally, we  
306 tested signature property #3 (combinatorial inhibition). Both its features, namely, assorted  
307 recruitment and extensive intersection, were satisfied in nearly every testable case (7/8 and 6/6  
308 planes respectively; Fig. 5d-g; Methods), despite the non-exhaustive sampling of Imc neurons in  
309 individual planes. In addition, the arbitrarily spaced and widely distributed nature of the RF lobes  
310 of individual model neurons (Supplementary Fig. 5jk), a model feature driving combinatorial  
311 inhibition, was also found in experimental data (Fig. 2ab, Supplementary Fig. 3a-d).

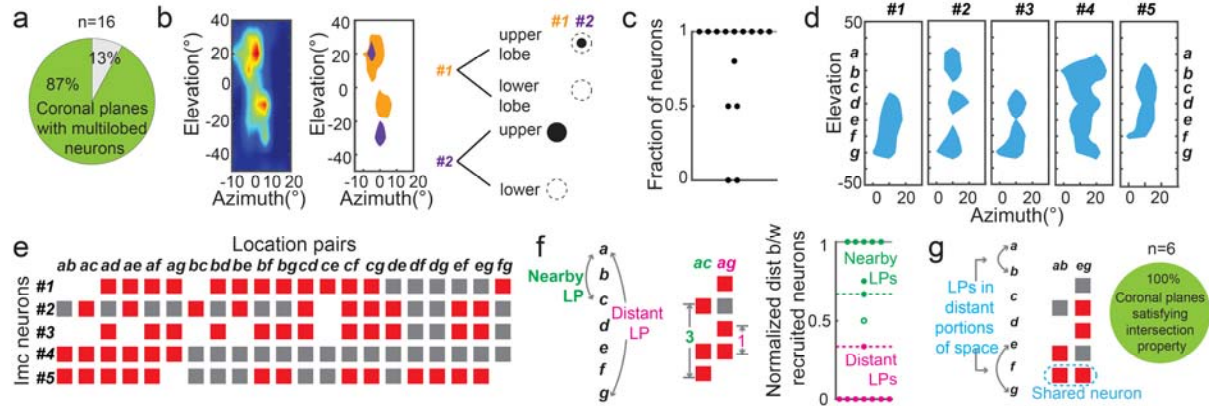

312

313 **Fig. 5. Experimental validation of model predictions in the Imc.** (a) Signature property #1: Pie-chart

314 summary of fraction of Imc coronal planes tested that contained multilobe neurons (87% = 14/16 planes; also Supplementary Fig. 3ef).

315 (b-c) Signature property #2. (b) *Left*: Rate map of RF of another Imc neuron sorted from the same recording site as the neuron in Fig. 1a-d.

316 (Only these two neurons were recorded in this Imc coronal plane.) *Middle*: Half-max of RFs of neurons in Fig. 1 (purple; reproduced

317 from 1d) and Fig. 5b left (orange). *Right*: For each Distant neuron, the upper RF lobe, but not lower one, shows

318 overlap, satisfying the testable lobe-overlap property (see text); conventions as in Fig. 4e. (c) Fraction of

319 multilobe neurons in each coronal plane satisfying the testable version of lobe-overlap property; dot –

320 coronal plane; median fraction = 1. (d-f) Signature property #3. (d) RFs (half-max) of all Imc neurons

321 recorded within an example coronal plane. a-g are seven (discretized) spatial locations encoded by these

322 neurons (Methods). (e) Selection matrix showing combinatorial activation of recorded neurons for

323 selection at different location-pairs; conventions as in Fig. 4c. (f) *Two left panels*: Illustration of

324 assortedness feature for example in d; conventions as in Fig. 4f (Methods). *Right*: Summary of this

325 feature across Imc coronal planes; only those planes containing  $\geq 3$  Imc neurons each were testable (8/14;

326 Methods) Dashed lines: Distance cut-offs for ‘distant’ neurons (green; 0.66) and ‘nearby’ neurons

327 (magenta; 0.33; Methods). Filled circles: Imc coronal planes that satisfied these cut-off criteria;  $\geq 7/8$  in

328 each case (Methods). (g) *Left*: Illustration of ‘extensive intersection’ feature for example in d;

329 conventions as in 4g. *Right*: Pie-chart summary of this feature across coronal planes (100% exhibited the

330 feature; 6/6). Note that this feature was testable only for those planes for which the recorded neurons

331

332 encoded location-pairs occupying distant portions of space (6/14; Methods).

333 **Metabolic and wiring costs explain specialized properties of Imc neurons.** Three questions  
334 regarding the biological implementation of location-invariant selection in the Imc circuit  
335 remained puzzling. First, why might  $N < L$  be biologically desirable in the Imc, in the first place  
336 (necessitating combinatorially optimized inhibition)? Second, if  $N < L$  is attractive biologically,  
337 why don't Imc RFs have a large number of lobes, thereby achieving greater savings in the  
338 number of Imc neurons (Fig. 4d)? In other words, why is the maximum number of Imc RF lobes  
339 restricted to a low number ( $k_{\max} = 3$ ; Fig. 1i)? Third, why is multilobed encoding found only  
340 along one spatial axis (here, elevation), why not along both axes for greater neuronal savings?

341 To gain insight into these questions, we examined Imc function in the context of two  
342 types of costs that nervous systems must incur in building and operating a neural circuit: wiring  
343 cost and metabolic cost. We estimated wiring cost by quantifying the cost of implementing  
344 spatially inverting projection patterns from the Imc to the OT (Methods <sup>22</sup>), and metabolic cost  
345 by quantifying the cost of broadcasting of spikes across the OT for competitive suppression. We  
346 found that wiring cost decreases as the number of RF lobes increases (Fig. 6a; Methods). In  
347 contrast, metabolic cost increases as the number of RF lobes increases (Fig. 6b; Methods).  
348 Consequently, the wiring cost places a lower bound on the number of RF lobes (and a  
349 corresponding upper bound on the number of neurons), whereas the metabolic cost places an  
350 upper bound on the number of RF lobes (and a lower bound on the number of neurons). The  
351 ideal number of RF lobes (and the number of neurons necessary), therefore, is one that  
352 minimizes some weighted combination of the two opposing costs (Fig. 6c; blue). Because Imc  
353 neurons have high firing rates (median = 76.5 Hz <sup>15,23</sup>; Fig. 1a), the metabolic cost of Imc  
354 function scales up substantially, pulling the ideal number of RF lobes to even lower values (Fig.



355 6c, red vs. blue; thereby also providing a rationale for the continued presence of some single-  
 356 lobe neurons in the Imc; Fig. 1i)

357 Taken together, these results indicate that a small number of Imc neurons ( $N < L$ ), with  
 358 multilobed RFs that have a small number of RF lobes (small  $k_{max}$  value), are ideally suited to  
 359 achieve location-invariant selection while minimizing the net neural costs. Therefore, increasing  
 360 excessively the number of RF lobes along one spatial axis (here, elevation), or increasing the  
 361 number of RF lobes also along the other axis as well (here, azimuth), is not biologically  
 362 desirable. The occurrence of multilobed encoding specifically along elevation, rather than  
 363 azimuth, is likely a side-effect of azimuthal inputs from OT's rostrocaudal axis being mapped  
 364 directly onto the parallel (and long) rostrocaudal axis of the Imc<sup>6</sup>, relegating elevation to be  
 365 coded by the transverse (and neurally sparse) planes.

366 **Fig. 6. Metabolic and wiring costs of location-invariant stimulus selection.** (a) Wiring cost plotted as  
 367 a function of the maximum number of Imc RF lobes allowed ( $k_{max}$ ); calculated across optimal model  
 368 solutions (Methods). (b)

369 Metabolic cost as a function of  
 370  $k_{max}$  (Methods). (c) Schematic  
 371 showing total cost (weighted  
 372 combination of a and b) for Imc

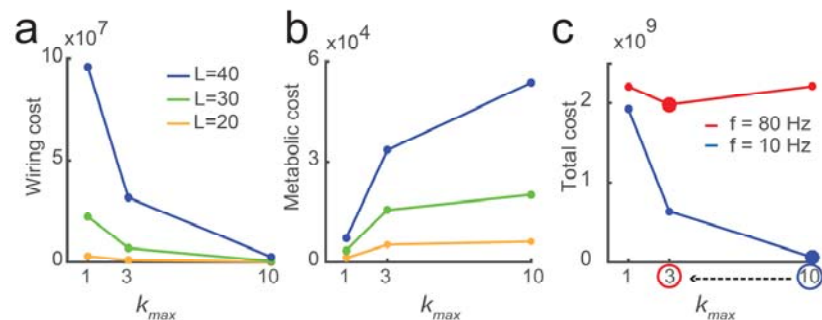

373 circuit to solve location-invariant selection for a given L at low average firing rates (blue: 10 Hz), and  
 374 high average firing rates (red: 80 Hz; Methods). Circled values along x-axis (and corresponding large  
 375 dots) indicate the optimal  $k_{max}$  values at the two firing rate levels. Results demonstrate left shift of optimal  
 376  $k_{max}$  with increasing firing rates (Methods). Absolute values of optimal  $k_{max}$  are a result of the specific  
 377 weights chosen here; weights identical for both curves. In all cases: mean  $\pm$  SD values are plotted; SD  
 378 values smaller than size of dots.

379 **Discussion.**

380 The combination of electrophysiology, theory, anatomy, and modeling in this study provides a  
381 detailed unpacking in owls of a critical neural function, namely location-invariant stimulus  
382 selection.

383 **Multilobed visuospatial RFs and stimulus selection.**

384 Multilobed spatial RFs have not been reported previously in any visual sensory area to the best  
385 of our knowledge. We find that in the Imc, a sensory area that is just two synapses away from the  
386 retina<sup>24</sup>, the majority of neurons have multilobed visual RFs. This contrasts with previous  
387 reports of large, vertically elongated visual RFs in the Imc<sup>17,18</sup> (a consequence of the detailed  
388 approaches used here, rather than species differences<sup>15</sup>). Multilobed Imc RFs were uncovered  
389 here using flashing dots as visual stimuli, a classical approach that has been used extensively in  
390 visual neuroscience studies across species. The use of this approach contrasts directly the  
391 unusual multilobed encoding of space by Imc with the single-lobed encoding of space by OT  
392 (Fig. 1k).

393 We demonstrate the need for such unusual encoding in the inhibitory Imc (Fig. 3), and  
394 uncover a novel neural strategy for location-invariant stimulus selection – combinatorially  
395 optimized feature coding by a sparse set of multilobe inhibitory neurons (COSMI; Fig 4). The  
396 need for this strategy is unimpacted by the simplifying assumption of binary RFs made by the  
397 optimization model (Supplementary Fig 4), and is further supported by experimental validation  
398 of model predictions (Fig. 5). Additionally, through subsequent estimation of the net cost of  
399 neural circuit operation, we provide a plausible rationale for ‘why’ the owl Imc may be  
400 organized, anatomically and functionally, in the way that it is (Fig. 6). The specific values of

401  $k_{\max}$ , the maximum number of RF lobes, used to develop this rationale (Fig. 6) represent values  
402 that are particularly relevant to the Imc:  $k_{\max}=1$  corresponds the single-lobed case,  $k_{\max}=3$   
403 corresponds to the experimentally determined value in the owl Imc, and  $k_{\max}=10$  corresponds to  
404 the practical upper bound on the number of possible RF lobes (based on the functional properties  
405 of Imc neurons; Methods).

406         The arguments in this study are framed in the context of selection between pairs of  
407 locations. Because selection among multiple stimuli requires comparisons between all possible  
408 pairs of stimulus locations, the computational principles uncovered here apply directly to the  
409 general problem of selection across an arbitrary number of competing stimuli.

#### 410 **COSMI is distinct from traditional population coding schemes**

411 Combinatorially optimized coding is conceptually distinct from traditional population neural  
412 coding schemes. For instance, in population vector coding, multiple neurons with overlapping,  
413 single-lobed tuning curves (or RFs) are activated to encode feature values such as stimulus  
414 locations, motion direction, etc., with high precision<sup>25-28</sup>. Typically, it is possible to order these  
415 RFs along the feature axis such that neighboring values of features are always encoded by  
416 functionally 'local' subsets of neurons (Supplementary Fig. 6ac). In contrast, neurons with  
417 multilobed RFs cannot be ordered this way: some neurons always code also for distant locations  
418 (Supplementary Figs. 6bd and 5i), and selection for a given location-pair cannot be guaranteed  
419 by a 'local' subset of neurons (Supplementary Fig. 6bd). A population coding scheme reported in  
420 the literature that does involve multilobed encoding as well as the activation of non-local neural  
421 subsets is the combinatorial coding of odors by olfactory receptor neurons<sup>29</sup>. Whereas assorted  
422 and extensively intersecting subsets of neurons are activated to encode odors, no inherent  
423 constraint on the relative positioning of these RF lobes across neurons has been demonstrated. In

424 contrast, in the combinatorially optimized coding reported here, the placement of RF lobes needs  
425 to be optimized across neurons, and is exemplified by the lobe-overlap property (Fig. 4e). For  
426 this same reason, our scheme also differs from the encoding of space by entorhinal grid cells: the  
427 firing fields of different grid cells are not inherently yoked to one another<sup>30,31</sup>. In addition, each  
428 grid cell has a large number of highly organized firing fields, unlike the few, and arbitrarily  
429 placed, RF lobes of Imc neurons. Finally, combinatorially optimized coding also stands in direct  
430 contrast to the sparse, orthogonal coding by an overcomplete set of neurons reported in many  
431 brain areas<sup>32,33</sup>: it involves promiscuous, non-orthogonal coding by an under-complete set of  
432 neurons. The problem of location-invariant selection with limited neurons, which yields  
433 combinatorially optimized coding in Imc, belongs to the same (np-complete) class of  
434 computationally complex problems as the traveling salesman problem and the minimum  
435 spanning tree problem<sup>34,35</sup>. Although the brain solves it naturally, exactly how Imc's optimized,  
436 multilobed RFs are specified during neural development is an intriguing open question.

#### 437 **Generality of COSMI beyond the owl Imc.**

438 The discoveries, here, of multilobed visual representation, a new form of population coding, and  
439 an efficient neural solution for a critical brain function (stimulus selection) have come from the  
440 systematic study of the functional response properties of inhibitory neurons in the owl Imc.

441 The Imc, called the periparabigeminal lateral tegmental nucleus (pLTN) in mammals, is  
442 conserved across vertebrate midbrains, as is the specialized anatomical connectivity between the  
443 Imc/pLTN and the OT/SC<sup>5,6</sup>. It is the primary source of long-range competitive inhibition to the  
444 OT<sup>16</sup>, and has been proposed to be a critical processing hub for stimulus selection for attention  
445<sup>7,15,16</sup>. However, the functional properties of this midbrain nucleus of emerging importance have  
446 not been studied in any vertebrate other than the barn owl thus far. The biological advantages

447 afforded by combinatorially optimized inhibition together with the Imc's conserved nature  
448 suggest that COSMI may be a solution employed generally by the vertebrate midbrain to achieve  
449 location-invariant spatial selection.

450         The computational principle of combinatorially optimized inhibition also extends  
451 naturally to selection across values of other stimulus features such as orientation, color, odor, etc.  
452 Typically, the functional properties of inhibitory neurons in cortical as well as sub-cortical areas  
453 are less well-studied than those of primary (pyramidal) neurons. Our results indicate that a  
454 careful examination of the encoding properties of inhibitory neurons in key brain areas may  
455 reveal COSMI, the result of concerted shaping of functional and structural circuit properties, as a  
456 widespread strategy for efficient, feature-invariant stimulus selection and decision-making under  
457 metabolic and anatomic constraints.

#### 458 **Acknowledgements**

459 This work was supported in part by funding from the Science of Learning Institute (JHU), and  
460 NIH R01 EY027718. We are grateful to Drs. James Knierim and Daniel O'Connor for feedback.

#### 461 **Author Contributions.**

462 NRM and SPM designed the research, performed experiments, analyzed the data and wrote the  
463 paper.

#### 464 **Competing Financial Interests**

465 The authors declare that there are no competing financial interests.

466

467

## 468 **Methods**

469 **Animals.** We performed experimental recordings in 15 head-fixed, non-anesthetized adult barn  
470 owls that were viewing a visual screen passively (*Tyto alba*). Both male and female birds were  
471 used; the birds were shared across several studies. All procedures for animal care and use were  
472 carried out following approval by the Johns Hopkins University Institutional Animal Care and  
473 Use Committee, and in accordance with NIH guidelines for the care and use of laboratory  
474 animals. Owls were group housed in enclosures within the aviary, each containing up to 6 birds.  
475 The light/dark cycle was 12 hrs/12 hrs.

476 **Neurophysiology.** Experiments were performed following protocols that have been described  
477 previously<sup>12,16</sup>. Briefly, epoxy-coated, high impedance, tungsten microelectrodes (A-M Systems,  
478 250 $\mu$ m, 5 -10 M $\Omega$  at 1 kHz) were used to record single and multi-units extracellularly. A mixture  
479 of isoflurane (1.5-2%) and nitrous oxide/oxygen (45:55 by volume) was used at the start of the  
480 experiment to anesthetize the bird and secure it in the experimental rig (a 30-minute period of  
481 initial set-up). Isoflurane was turned off immediately after the bird was secured and was not  
482 turned back on for the remainder of the experiment. Frequently, nitrous oxide was also turned off  
483 at this point, but in several experiments, it was left on for a few hours if the bird's temperament  
484 necessitated it (some birds were calm when restrained, while others were not). However, it was  
485 turned off at least 30 minutes before the recording session. Our recordings were performed  
486 starting, typically, 3 hours after initial set-up (the time required for positioning the electrode). As  
487 recovery from isoflurane occurs well under 30 minutes after it is turned off, and recovery from  
488 nitrous oxide occurs within a minute (the bird stands up and flies away if freed from restraints),  
489 recordings were made in animals that were not anesthetized and non-tranquilized.

490 We first targeted the OT based on well-established methods<sup>8</sup>. We then navigated to the

491 Imc using the OT's topographic space map as reference and previously published methods  
492 (Supplementary Fig. 1a)<sup>16</sup>. The Imc is located approximately 16 mm ventral to the surface of the  
493 brain. Dorsoventral penetrations through the Imc were made at a medial-leading angle of 5° from  
494 the vertical to avoid a major blood vessel in the path to the Imc.

495 **Visual stimuli and RF measurement.** Visual stimuli used here have been described previously  
496 <sup>12,13</sup>. Briefly, either stationary, translating, or looming visual dots (of fixed contrast) were flashed  
497 at different locations on a tangent TV monitor in front of the owl. Looming stimuli were dots that  
498 expanded linearly in size over time, starting from a size of 0.6° in radius. Visual stimuli were  
499 presented for a duration of 250ms (and inter stimulus interval of 1.5-3 s) at all sampled locations.  
500 Pilot experiments indicated that visual RFs were narrow in azimuth but spread along the  
501 elevation. Therefore, RF measurements were made by presenting stimuli over the -60° to 60°  
502 range in elevation, and over a 40° ( $\pm 10.4^\circ$ ) range in azimuth (centered around the azimuth that  
503 yielded the best responses). Each sampled stimulus location was repeatedly tested 9-15 times in a  
504 randomly interleaved fashion. Multi-unit spike waveforms, recorded using Tucker Davis  
505 Technologies hardware interfaced with MATLAB, were sorted off-line into putative single  
506 neurons (see below). The spatial responses for each neuron were measured by counting spikes at  
507 each sampled location during a 100-350 ms time window following stimulus onset.

508 **Spike sorting multi-unit data.** The '*chronux*' spike-sorting toolbox was used for the majority of  
509 the analyses<sup>36</sup>. This method is based on a hierarchical unsupervised clustering approach in  
510 which the spike waveforms are initially classified into a large number of clusters, typically 10  
511 times the number of putative units recorded. Clusters with very few spikes are discarded and the  
512 remaining clusters are then aggregated automatically using metrics of similarity between

513 waveform shapes. In addition, we include only those units for analysis that have less than 5% of  
514 the spikes within 1.5 ms of each other (ISI criterion).

515         The statistical separability of individual sorted units was assessed based on the distance  
516 of a unit's cluster (of waveforms) from the clusters corresponding to other units as well as the  
517 outlier cluster measured at the same site. We first projected the spike waveforms measured at a  
518 given site to a 3-dimensional space using principal components analysis. Then, we performed a  
519 one-way ANOVA test to examine if the mean of the waveforms of a given unit (in the projected  
520 3-dimensions) was significantly different from the means corresponding to the other units and  
521 the outliers. This was followed by the Holm-Bonferroni criterion for multiple comparisons. In a  
522 few cases (4/116), there were either too few waveforms in the outlier cluster (number of  
523 waveforms in outlier cluster < 8% of number of waveforms in any of the remaining sorted units),  
524 or the outlier waveforms did not form a cluster with a Gaussian distribution. In such cases, we  
525 only tested for the distance of the unit's cluster mean from the cluster means of other units. We  
526 regarded only those units whose cluster means were significantly different from the means of all  
527 other units (and the outlier cluster) as 'well-separated' units per this separability criterion  
528 ( $p < 0.05$ ; the p-value plotted for each unit in Figure 1i is the largest p-value obtained across all  
529 comparisons for that unit). Only well-separated units were included in all remaining analyses  
530 (subsequent to Fig. 1i) in this study.

531 **Identification of the optimal number of RF lobes (Fig. 1).** In order to determine the number of  
532 firing fields (or lobes) in an RF in an unbiased manner, we first transformed the measured RF  
533 responses to a distribution of points in 2-dimensional space (azimuth x elevation). This  
534 distribution was generated such that the density of points around each sampled spatial location  
535 was proportional to the firing rate of the neuron evoked by a visual stimulus presented at that



536 location. We achieved this by distributing points randomly and uniformly within a rectangle  
537 centered around the sampled location such that the number of points was equal to the firing rate  
538 at that location; the dimensions of the rectangle were the azimuthal and elevational sampling  
539 steps, respectively. This transformation allowed us to apply spatial clustering methods to the  
540 firing rate maps.

541 Next, using the density peaks clustering method<sup>19</sup>, we fit successively  $k=1,2,3\dots6$   
542 clusters to the distribution (Fig. 1cg). This clustering method identifies cluster centers by  
543 searching for regions that have high local density of points ( $\rho$ ) that are also far away from any  
544 points of equal or higher density ( $\delta$ =minimum distance from points of equal or higher density;  
545 Supplementary Fig. 2c-f. For the point with highest local density,  $\delta$  is conventionally taken as the  
546 maximum distance of the point from all other points). It is robust to nonlinear cluster boundaries  
547 and unequal cluster sizes – conditions under which traditional methods like k-means perform  
548 poorly. The  $k$  cluster centers are chosen by the algorithm as points with the  $k$  highest values of  
549 gamma ( $\gamma$ ), defined as the product of  $\rho$  and  $\delta$ . We repeated this procedure for each  $k$ , thereby  
550 fitting the 1-best, 2-best, ... 6-best clusters to the data.

551 Following this, we applied a model selection procedure to identify the optimal number of  
552 clusters in the data, i.e., the best  $k$  value ( $k^*$ ), based on the ‘gap statistic’<sup>20</sup>. This is an unbiased  
553 method to detect the number of clusters that best fit a distribution of points. For each  $k$ , we  
554 estimated a ‘gap’ value ( $gap(k)$ ), which evaluated the goodness of fitting  $k$  clusters to the  
555 distribution. The gap value was calculated by standardizing the pooled within-cluster sum of  
556 square distances between all points in each of the  $k$  clusters ( $W_k$ ) and comparing its log value  
557 ( $\log(W_k)$ ) to the expectation of this quantity, ( $E^*(\log(W_k))$ ), under the null hypothesis that the  
558 data contains only one cluster<sup>20</sup>. We calculated this in MATLAB by using the ‘*evalclusters*’

559 function with ‘gap’ as the evaluation method, which yielded  $gap(k)$  as well as  $se(k)$  for each  $k$ ;  
560  $se(k)$  was the standard error in the estimate of  $gap(k)$ . Then, the gap selection statistic was  
561 defined as,  $GAP(k) = gap(k) - gap(k+1) + se(k+1)$ . The number of clusters that fit the data  
562 optimally is defined by the method as the smallest value of  $k$  for which  $GAP(k) \geq 0$ .  
563 Conceptually, the value of  $GAP(k)$  for the null hypothesis ( $k^*=1$ ) keeps decreasing linearly with  
564 increasing  $k$ , whereas the rate of the decrease of the metric under the alternate hypothesis ( $k^*>1$ )  
565 has been shown to fall exactly at  $k=k^*$ . Hence the ‘gap’ between the two curves is maximum at  
566  $k=k^*$ , and  $GAP(k)$ , the difference between  $gap(k)$  and  $gap(k+1)$  is greater than zero for the first  
567 time when  $k=k^*$ .

568 **Defining the centers of RF lobes.** The center of an RF lobe defined as the stimulus location  
569 evoking the highest firing rate within that lobe. The azimuthal RF ‘center’ of an Imc neuron is  
570 defined as the average of the azimuthal centers of all of its RF lobes, because RF lobes of an  
571 individual neuron do not vary significantly in azimuth (Fig. 2a; blue). The azimuthal RF ‘center’  
572 of a recording site in the Imc, across all the neurons recorded at that site, is defined as the  
573 average of the azimuthal centers across all the RF lobes of all the neurons recorded at that site.  
574 This is valid because RF centers of individual neurons within a recording site do not vary  
575 significantly in azimuth (Fig. 2b; blue). The azimuthal RF ‘center’ of a penetration is defined as  
576 the average of the azimuthal centers across all recording sites in that penetration. This is valid  
577 because RF centers of individual recording sites within a penetration do not vary significantly in  
578 azimuth (Fig. 2c).

579 **Monte-Carlo analysis of the effect of neuronal noise and spatial sampling resolution on**  
580 **number of detected RF lobes (Fig. 1).** A low spatial sampling resolution during the  
581 measurement of spatial RFs, as well as high variability in neural responses, could both cause a

582 single lobed RF to appear falsely as a multilobed one (see Supplementary Fig. 2g). To test how  
583 robust our method for identifying the ideal number of RF lobes is to sampling resolution  
584 (sampling step-size) and neural response variability (response Fano-factor; defined as  
585 variance/mean), we performed the following control. First, we generated a single-lobed Gaussian  
586 in 2D (azimuth x elevation), with mean and covariance equal to the average values of these  
587 parameters across all the experimentally measured Imc RFs (114 Imc units). Using this single-  
588 lobed Gaussian as ‘reference’, we repeatedly simulated RFs using different step-sizes and  
589 different response Fano-factor values: For a given step-size, the firing rate at each location was  
590 chosen randomly from a normal distribution with mean equal to the value yielded by the  
591 reference Gaussian at that location, and variance determined by the Fano-factor value. Next, we  
592 transformed this simulated RF into a distribution of 2-D points and applied the density peaks  
593 clustering method. Finally, we applied the gap-statistic model selection method to determine the  
594 ideal number of lobes in the RF. We repeated this 150 times for each step-size and Fano-factor  
595 pair, and calculated the fraction of times for which multiple RF lobes were detected  
596 (erroneously) in this data. We repeated the whole procedure for a range of step-size and Fano-  
597 factor values that subsumed the range of experimental step-sizes and measured Fano-factor  
598 values, and identified the zone that yielded  $\geq 5\%$  false detection rate of multiple lobes (Fig. 1j).

599       To test if our experimental conditions had a high chance of falsely detecting multilobed  
600 RFs, we compared the experimentally used step-size for each RF and the RF’s Fano-factor value  
601 with those that yielded a  $\geq 5\%$  false detection rate in simulation. The Fano-factor for each RF  
602 was calculated as the average of the Fano-factor values at all sampled locations in that RF. The  
603 step-size for each RF was calculated as the average of the azimuth and elevation sampling steps  
604 used to measure the RF. We found that all of our RFs were well within the ‘safe’ zone of  $\leq 5\%$

605 error (Fig. 1j). Thus, the detection of multilobed RFs in our data was unlikely to be a spurious  
606 consequence of sub-optimal measurement conditions.

607 **Theoretical calculations regarding the need for multilobed RFs.** We wondered if the  
608 implementation of stimulus selection in the OTid, specifically, location-invariant selection in the  
609 OTid, imposed any demands on Imc RF structure. To this end, we compared the total number of  
610 location-pairs at which selection must occur in the OTid, with the number of location-pairs at  
611 which selection is achievable by a set of Imc neurons. Since multilobed Imc encoding is  
612 restricted along the elevation (Fig. 2ab), we focused on stimulus selection between all possible  
613 pairs of elevations at any azimuth.

614 Simplified version: We started by making two simplifying assumptions: (a) that the OT space  
615 map is a collection of non-overlapping spatial RFs that tile sensory space, and (b) that each Imc  
616 neuron has exactly  $k$  RF lobes ( $k$  always  $\geq 1$ ).

617 In this scheme, if the number of distinct elevations (at a given azimuth) in the discretized  
618 OT space map is  $L$ , then the total number of distinct pairs of stimulus locations possible is  $L(L-$   
619  $1)$ . A stimulus placed within any RF lobe of a  $k$ -lobed Imc neuron can suppress competing  
620 stimuli located anywhere outside the RF, i.e., at  $L-k$  locations. Therefore, each Imc neuron is  
621 capable of implementing competitive selection at  $k(L-k)$  pairs of locations. With  $N$  such Imc  
622 neurons, the number of pairs of stimulus locations at which competitive selection can be resolved  
623 by the Imc is at most  $Nk(L-k)$ . Note that this quantity is computed assuming no overlap between  
624 Imc RFs and is greater than the number of pairs of stimulus locations at which competitive  
625 selection can be resolved by the Imc if overlap between RFs is allowed. Therefore, to achieve  
626 successful competitive suppression between all possible pairs of stimulus locations, i.e., location  
627 invariance, a condition that must be satisfied is

628 
$$Nk(L - k) \geq L(L - 1) \quad - (1)$$

629 
$$\Rightarrow k \geq \frac{L(L-1)}{N(L-k)} \quad - (2)$$

630 This necessary (but not sufficient) condition for location invariance is already very  
631 revealing: If all Imc neurons had only single lobed RFs, i.e.,  $k = 1$ , the above inequality reduces  
632 to  $N \geq L$ , i.e., the number of Imc neurons would need to be greater than or equal to the number  
633 of distinct spatial locations. Since the logical proposition ‘A => B’ is exactly the same as the  
634 proposition ‘not (B) => not (A)’, in our case, the proposition ‘ $k = 1 \Rightarrow N \geq L$ ’ is exactly the  
635 same as the proposition ‘ $N < L \Rightarrow k \neq 1$ ’, i.e., if the number of Imc neurons is less than the  
636 number of spatial locations, then at least one Imc RF must be multilobed (because RFs cannot  
637 have fewer than one lobe, by definition).

638 This conclusion held true even when both the simplifying assumptions – (a) that OT RFs  
639 are non-overlapping, and (b) that all Imc neurons have the same number of RF lobes – were  
640 relaxed (see ‘Full version’ next).

641 Full version: We used a more biologically accurate model of space in which RF extents, overlap  
642 of RFs across neurons, and the resolution of competition reported in the OTid (the minimum  
643 distance between two stimuli such that OTid is able to select the stronger of the two stimuli)<sup>12</sup>  
644 were all modeled to match experimental data. In addition, we allowed varying numbers of Imc  
645 RF lobes:

646 Let the total range of elevational locations for which barn owl’s midbrain encodes space  
647 be  $R$  and the resolution of encoding space be  $r$ . Then, the number of distinct locations at which a  
648 stimulus can be placed along elevation is  $L = \frac{R}{r}$ . Let the resolution for competitive selection be  
649  $C_{res}$ .

650 The total number of distinct location-pairs at which two competing stimuli can be placed  
651 such that they are greater than  $C_{res}$  apart from each other is approximately  $L \left( L - \frac{2C_{res}}{r} \right)$ . Note  
652 that this quantity is calculated by counting all the locations at which a second stimulus can be  
653 placed such that it is at least  $C_{res}$  away on either side of a first stimulus that is placed in any of the  
654  $L$  locations. However, when a first stimulus is placed at the edge of the visual field, a second  
655 competing stimulus can be placed only on one side such that it is  $C_{res}$  away. It is straightforward  
656 to show that  $L \left( L - \frac{2C_{res}}{r} \right)$  is smaller than the quantity when we include the edge effects. Hence,  
657 for location invariance to be achieved, selection of the stronger stimulus must at least be  
658 implemented when two competing stimuli are placed in any of these possible location-pairs.

659 Let the number of lobes in a given Imc neuron be  $k$ . Let the half-max size of each lobe be  
660  $l_h$ . Then, a  $k$  lobed Imc neuron solves competition for a total of  $k \left( L - \frac{l_h}{r} k \right)$  location-pairs  
661 (assuming each Imc neuron sends inhibition to all locations that lie outside the half-max extent  
662 of the neuron's RF, without loss of generality; see "Model assumptions" section below and  
663 Supplementary Fig. 4 for implications of this assumption). This is just the number of location-  
664 pairs such that one stimulus can be placed inside the multi-lobed RF (at its peak for effective  
665 suppression of competing stimuli) and the other outside. Let the total number of  $k$  lobed Imc  
666 neurons be  $N_k$ .

667 Therefore, the total number of Imc neurons is

$$668 \quad N = \sum_k N_k k \quad - (3)$$

669 To achieve location invariance, we need

$$670 \quad \sum_k N_k k \left( L - \frac{l_h}{r} k \right) \geq L \left( L - \frac{2C_{res}}{r} \right) \quad - (4)$$

671 Since  $k \geq 1$ , and  $l_h > 2C_{res}$  (mean  $l_h = 33.6^\circ \pm 1.25^\circ$  from the 209 RF lobes across 114  
672 Imc neurons we measured, and  $C_{res} < 10^\circ$ ), we get

$$673 \left( L - \frac{l_h}{r} k \right) \leq \left( L - \frac{2C_{res}}{r} \right) \quad - (5)$$

674 Using (5) in (4) gives,

$$675 \sum_k N_k k \geq L \quad - (6)$$

676 In other words, if all the Imc neurons are single lobed ( $k=1$ ), this equation becomes  
677  $N \geq L$ . Since the logical proposition 'A => B' is exactly the same as the proposition 'not (B) =>  
678 not (A)', the proposition ' $k = 1 \Rightarrow N \geq L$ ' is exactly the same as the proposition ' $N < L \Rightarrow k \neq$   
679  $1$ ' i.e., if the number of Imc neurons is less than the number of spatial locations, then at least one  
680 Imc RF must be multilobed (because RFs cannot have fewer than one lobe, by definition).

681 **Histology (Fig. 3).** Owls were perfused with paraformaldehyde and their brains extracted per  
682 standard procedures. The fixed brains were blocked so that the rostro caudal axis of the Imc was  
683 perpendicular to the sectioning plane, and brain sections of 40  $\mu\text{m}$  thickness were obtained.  
684 Sections containing Imc were mounted, Nissl stained, and cover-slipped. Sections were imaged  
685 at 40x under a light microscope and the number of Nissl stained somata in the Imc in each  
686 section were manually counted by NRM and SPM independently<sup>21</sup>. For each section, the  
687 maximum value of the counts from the two authors was used to generate the plot in Fig. 3c.

688 **Location-invariant selection across azimuthal locations.** The OTid encodes azimuths ranging  
689 typically from  $-10^\circ$  to  $60^\circ$  at a spatial resolution of no better than  $1^\circ$ <sup>8,12</sup>. Consequently, the  
690 number of distinct azimuthal locations encoded by each OTid is  $\leq 70$  ( $L_{az} \leq 70$ ).

691 Because the rostrocaudal extent of the Imc is 2800  $\mu\text{m}$ , and the somas of Imc neurons are  
692 no larger than  $\sim 33 \mu\text{m}$  (largest somatic dimension = 33  $\mu\text{m}$ , n=456 neurons across 20 coronal

693 sections), there are at least 70 (coronal) sections along the rostrocaudal axis of the Imc, with each  
694 section containing at least one Imc neuron not also found in the neighboring sections.  
695 Consequently, there are at least 70 neurons involved in encoding the  $L_{az}$  distinct azimuths,  $N_{az} \geq$   
696 70;  $N_{az} \geq L_{az}$ . (For this conservative estimate of  $N_{az}$ , we only need that of the ~26 neurons in each  
697 successive coronal section of the Imc (median #neurons per section = 26; Fig. 3c; dashed red  
698 line), just one be distinct.

699 Thus, there are sufficient Imc neurons to encode azimuthal locations, precluding the need  
700 for a combinatorial solution for location invariant selection along the azimuth (involving  
701 multilobe neurons with RF lobes spread along the azimuth). Consistent with this expectation,  
702 azimuthal encoding by Imc neurons is effectively single-lobed: all lobes of a multilobe Imc  
703 neuron encode the same azimuth (Fig. 2a-c).

#### 704 **Optimization model for solving location-invariant stimulus selection across elevations (Fig.** 705 **4)**

706 Conceptualizing and setting-up the model (Supplementary Fig. 4):

707 In our model,

- 708 •  $L$  = number distinct spatial elevations at a given azimuth encoded in our model (i.e., the  
709 number of elevations in the ‘OTid’ space map).
- 710 •  $N$  = number of model Imc-like neurons, i.e., neurons with Imc-like anatomical projection  
711 patterns.
- 712 •  $k_{max}$  = maximum number of RF lobes allowed for each model neuron.
- 713 •  $N^*$  = smallest number of upto- $k_{max}$ -lobed model neurons needed to solve location-invariant  
714 selection across  $L$  elevations.



715 The optimization model solves for the number and positions of RF lobes of each of the  $N$  model  
716 neurons in order to achieve location-invariant selection. The model neurons are ‘Imc-like’: each  
717 of them is excited by a stimulus placed anywhere within its RF, and delivers competitive  
718 inhibition to all locations in the OTid space map outside its RF that is proportional to the strength  
719 of the stimulus (Supplementary Fig. 4ab). Without loss of generality, we take stimulus priority =  
720 1 unit (for all stimuli), and the proportionality constant (underlying inhibition by the Imc) to be  
721 1. Therefore, for each stimulus, each neuron excited by that stimulus generates an inhibition of 1  
722 unit at those locations in the OTid that are outside that neuron’s RF (Supplementary Fig. 4ab).  
723 For successful, relative-priority dependent competitive stimulus selection between stimuli  
724 presented at a given pair of locations, the net inhibition at these two locations in the OTid should  
725 be equal. For location-invariant competitive selection, this condition must hold for stimuli placed  
726 at any pair of all the possible  ${}^L C_2$  ( $L$  choose 2) pairs of locations. The details of the setup of the  
727 optimization problem are described below.

728 Let  $X$  be a matrix of size  $L \times N$  (Supplementary Fig. 4c), where the  $j^{\text{th}}$  column of the  
729 matrix corresponds to the  $L$  elevational locations encoded by the  $j^{\text{th}}$  Imc neuron in the population.  
730 The optimization problem is framed as  $\min_X f(X; L, N)$ , where the objective function  $f(X)$  is  
731 designed such that it achieves its minimum value (of  $-L(L-1)$ ) for a given  $L$  only when the RFs of  
732 the model neurons achieve location-invariant selection.

733 Consider two competing stimuli (of equal strength) placed at locations 1 and 2. In our  
734 scheme, we represent this by a row vector  $\mathbf{a}_{1 \times n} = [1 \ 1 \ 0 \ \dots 0 \ \dots 0]$  (Supplementary Fig. 4d). The  
735 ones in the first two indices of the row vector correspond to the two locations at which the  
736 competing stimuli are placed.

737 Note that  $X^T \mathbf{a}^T$  results in a vector in which the  $j^{th}$  index corresponds to the number of  
738 locations that the  $j^{th}$  neuron is activated by when the two competing stimuli are placed in  
739 positions shown in  $\mathbf{a}$  (Supplementary Fig. 4e).

740 Additionally, the matrix  $(X-1)$  corresponds to the suppression image of the Imc  
741 population. The  $j^{th}$  column of this matrix represents the locations to which the  $j^{th}$  Imc neuron  
742 sends inhibition in the OT space map. This is because of the inverse anatomical projections from  
743 the Imc to the OT. The product  $(X-1)X^T \mathbf{a}^T$  then results in a vector in which the  $j^{th}$  index  
744 corresponds to the net inhibition sent to the  $j^{th}$  location by the entire Imc population when the two  
745 competing stimuli are placed at different locations, i.e., at different positions within the row  
746 vector  $\mathbf{a}$  (Supplementary Fig. 4f).

747 For competitive selection at these two locations, the net inhibition at these two locations  
748 in the space map of the model ‘OTid’ should be equal. To penalize solutions for which this is not  
749 the case, we include a cost term in the objective function that is equal to the square of difference  
750 in the inhibition at the two locations. This is written mathematically as

$$751 \quad f_1(X; \mathbf{a}, L, N) = (\mathbf{b}(X - 1)X^T \mathbf{a}^T)^2 \quad - (7)$$

752 where  $\mathbf{b}$  is a row vector whose length equals that of  $\mathbf{a}$  and nonzero indices are same as  $\mathbf{a}$ , but with  
753 the sign of one of the 1s flipped (in this case  $\mathbf{b} = [1 \ -1 \ 0 \ \dots \ 0 \ \dots \ 0]$  or  $[-1 \ 1 \ 0 \ \dots \ 0 \ \dots \ 0]$ ). The  
754 minimum value that  $f_1$  can take is 0, which happens when equal inhibition is sent to both the  
755 locations at which the competing stimuli are placed (Supplementary Fig. 4f).

756 In addition to the strength of inhibition at the two locations being equal, the strength of  
757 inhibition must be strictly negative. This is because, the other possibility, of strength of  
758 inhibition at each location being zero, would not be acceptable because no inhibition would be

759 sent to either of the two locations. To penalize solutions for which this condition is not met, we  
 760 include a cost term in the objective function that is equal to the number of locations at which the  
 761 inhibition is not negative. This is written mathematically as

$$762 \quad f_2(X; \mathbf{a}, L, N) = \mathbf{a} * \text{sign}((X - 1)X^T \mathbf{a}^T) \quad - (8)$$

763 Minimizing  $f_2$ , therefore, ensures that inhibition is sent to both the locations. The  
 764 minimum value  $f_2$  can take is -2, when inhibition is sent to both the competing locations  
 765 (Supplementary Fig. 4f).

766 Finally, we write the full objective for the location-pair (specified via vector  $\mathbf{a}$ ) as

$$767 \quad f(X; \mathbf{a}, L, N) = f_1(X; \mathbf{a}, L, N) + f_2(X; \mathbf{a}, L, N) \\ 768 \quad = (\mathbf{b}(X - 1)X^T \mathbf{a}^T)^2 + \mathbf{a} * \text{sign}((X - 1)X^T \mathbf{a}^T) \quad - (9)$$

769 the minimum possible value of which is -2.

770 For location invariance to be achieved, the function  $f$  should be minimized for each pair  
 771 of locations at which competing stimuli can be placed. In other words,  $f$  should be minimized for  
 772 all possible permutations of vector  $\mathbf{a}$ . This can be written mathematically as

$$773 \quad f(X; \mathbf{a}, L, N) = \text{tr} (B(X - 1)X^T A^T .* B(X - 1)X^T A^T) + \\ \text{tr} (A * \text{sign}((X - 1)X^T A^T)) \quad - (10)$$

774 where  $A$  is the permutation matrix of  $\mathbf{a}$  for all possible location-pairs and  $B$  is the corresponding  
 775 permutation matrix of  $\mathbf{b}$ .  $\text{tr}(Y)$  refers to the trace (sum of all the diagonal elements) of the matrix  
 776  $Y$ ,  $Y.*Z$  is the Hadamard (element-wise) product between the matrices  $Y$  and  $Z$  and  $\text{sign}(Y)$  is a  
 777 matrix obtained by applying the element-wise sign operator to the matrix  $Y$ .

778 Because there are  ${}^L C_2$  possible location-pairs (corresponding to the  ${}^L C_2$  permutations of the  
779 vector  $\mathbf{a}$ ), the minimum value that  $f$  can achieve is  $-2 * {}^L C_2 = -L(L-1)$ . Thus, location-invariant  
780 selection is achieved in our optimization model if and only if the cost function converges to the  
781 lowest possible value of  $-L(L-1)$ .

782 We add two constraints to this optimization scheme. First, we code the RFs of all the  
783 model neurons with ones (inside RF) and zeros (outside RF), a simplifying assumption (see  
784 “Model assumptions” section below for implications of this assumption). Second, we introduce a  
785 mechanism to limit the number of lobes in any model neuron to  $k_{max}$ . This is done so that, by  
786 setting  $k_{max} = 3$ , we would be able to match the experimentally observed constraint that there are  
787 no more than three RF lobes per Imc neuron. The first constraint is fed into the optimization  
788 problem as bounded integer constraints with bounds between 0 and 1 to make the RFs binary.  
789 The second constraint is implemented as an inequality constraint, written mathematically as

$$790 \quad g(j) = k_{max} - \mathbf{1}_L * X_j \geq 0, \text{ for all } j = 1, 2 \dots N \quad - (11)$$

791 where  $\mathbf{1}_L$  is a row vector of length  $L$ , and  $X_j$  is the  $j^{th}$  column of  $X$  corresponding to the RF of the  
792  $j^{th}$  neuron. Additionally, we also test the model with  $k_{max} = 10$  for some of the analyses reported  
793 in Fig. 4, Fig. 6 and Supplementary Fig. 5.

794 We solve the above nonlinear optimization problem with mixed constraints, an np-  
795 complete problem, using the ‘MIDACO’ solver in MATLAB<sup>37</sup>.

#### 796 Estimating $N^*$ :

797  $N^*$  is the smallest number of model neurons needed to solve location-invariant selection for a  
798 given  $L$  and  $k_{max}$ , i.e., the smallest  $N$  for which the minimum value of the objective function ( $-$   
799  $L(L-1)$ ) can be successfully achieved. This was estimated as follows. For each value of  $N$  from 1

800 to  $L$ , we ran the optimization model 1000 times (1000 runs). Any given run was said to have  
801 converged to a solution if the value of cost function did not change for 1000 successive iterations  
802 (by setting the ‘*evalstop*’ criterion in the optimization code to 1000), thereby reaching an  
803 asymptotic value. The collection of model neuron RFs at convergence was called a ‘convergent  
804 solution’. Additionally, if the convergent solution attained the value of  $-L(L-1)$ , then it was  
805 called an ‘optimal solution’. In other words, optimal solutions are ones that converged and  
806 additionally achieve location-invariant stimulus selection.

807  $N^*$  (for a given  $L$  and  $k_{max}$ ) is, therefore, the smallest value of  $N$  for which at least one of  
808 the 1000 runs yielded an optimal solution, meaning that for  $N = N^*-1$ , none of the 1000 runs  
809 yielded a solution that successfully achieved location-invariant selection.

810 For instance, if  $k_{max}=1$  lobe, then for all  $L$ ,  $N^* = L$  (Fig. 4d, blue data; consistent with  
811 theoretical calculation presented in the text surrounding Fig. 3). If  $k_{max} = 3$  lobes and  $L = 5$   
812 elevations, all runs for all values of  $N$  from 1 to  $L$  yielded convergent solutions, but *optimal*  
813 solutions were produced only when  $N \geq 4$  (Supplementary Fig. 5a). More generally, if  $k_{max} > 1$   
814 lobe, then for all  $L > 4$ ,  $N^* < L$  (Fig. 4d; red and black data).

815 Range of  $k_{max}$  values chosen for various analyses (Fig. 4d onwards):

816 The specific values of  $k_{max}$  used in our simulations (Fig. 4 and 6) were 1, 3, and 10 lobes. The  
817 reasoning for this choice of values is described below.

- 818 •  $k_{max} = 1$  lobe corresponded to the null hypothesis of single lobed RFs
- 819 •  $k_{max} = 3$  lobes represented Imc data (Fig. 1i)
- 820 •  $k_{max} = 10$  lobes. (i) The range of elevations encoded by the OTid and the Imc is no greater  
821 than  $-60^\circ$  to  $-60^\circ$ , and (ii) Most individual RF-lobes have a half-max height  $\geq 10^\circ$  (10-

822 percentile value of half-max height of an individual RF lobe =  $10^\circ$  (Supplementary Fig. 3e).

823 Therefore, the number of possible distinct lobes along elevation for RFs of typical Imc  
824 neurons  $\leq \sim 10$  lobes ( $= 120^\circ / (10^\circ + 2^\circ)$ ; with the two added degrees representing  $1^\circ$  spacing  
825 on either side of a lobe to separate it from abutting ones.)

#### 826 Model assumptions:

827 Our optimization model makes two key simplifying assumptions: (a) discretized (pixelated)  
828 spatial locations, and (b) binary (on or off) RFs of the model neurons. The former assumption  
829 can be readily reconciled with biology by making the pixel size sufficiently small. Therefore, this  
830 assumption does not result in loss of generality of the model. Second, the pattern of spatial  
831 inhibition sent to the OTid space map, the key computational function required of Imc in the  
832 model, is the spatial inverse of the RF: inhibition is sent to all locations except the ones inside  
833 the RF. In other words, the spatial pattern of inhibition is, by definition, a ‘*binarized* spatial  
834 inverse’ of the Imc RF, with the strength of delivered inhibition being proportional to the specific  
835 location within the continuous RF at which the stimulus is placed (Supplementary Fig. 4ab). For  
836 the model, it is the pattern of inhibition that is critical, informationally speaking, rather than the  
837 variations in the strength of delivered inhibition based on the specific location within RF that a  
838 stimulus occupies (Supplementary Fig. 4ab). (This is unlike population vector coding, where the  
839 specific values of firing rates within an RF are critical informationally<sup>25-28</sup>). Therefore, the  
840 continuous RF can be binarized itself (say, at the half-max, or 75%-max level) without the  
841 qualitative conclusions of the model being affected (Supplementary Fig. 4ab). Notably, despite  
842 these simplifying abstractions of the biology by the model, we found that predictions from the  
843 model held true experimentally (Fig. 5), further revealing that the model captured sufficiently  
844 well the key computational principles at play in this circuit. Consequently, it was able to provide

845 a compelling explanation for the unusual functional properties of Imc neurons, and illuminate  
846 neural mechanisms of location-invariant stimulus selection in this midbrain circuit.

847

848 **Characterizing signature properties of optimal model solutions, and testing them in**  
849 **experimental data (Figs. 4 and 5).**

850 **The “multilobe property” (property #1).**

851 Model: For each optimal solution at each  $(L, N^*, k_{\max})$  tested, we examined if any of the model  
852 RFs were multilobed. A model RF was said to be multilobed if it had “on” pixels that were  
853 separated by “off” pixels; two adjacent “on” pixels were treated as one lobe. For instance, in Fig.  
854 4a, neurons #2 and #4 have one lobe each. Neuron #1 has two RF lobes and neuron #2 has 3 RF  
855 lobes. These two neurons are multilobed. Thus, this optimal model solution is said to satisfy the  
856 “multilobe property”.

857 Data: For each coronal Imc plane recorded, we examined if any of the neurons in that plane had  
858 multilobed RFs. Whether an RF was single or multilobed was determined using methods  
859 described in (and surrounding) Fig. 1.

860 **The “optimized lobe-overlap property” (property #2).**

861 Model: A multilobed model neuron that shares each of its RF lobes, but not all, with another  
862 neuron is said to satisfy this property. If every neuron in a model solution satisfies this property,  
863 the model solution itself is said to satisfy the optimized lobe-overlap property. The fraction of  
864 model solutions satisfying this property for each  $(L, N^*)$  is plotted in Supplementary Fig. 5C  
865 (100%, in each case).

866 Data: The set of neurons recorded within a given coronal plane, i.e., across all the recording sites  
867 along a dorsoventral penetration, is collectively a potential solution set for location-invariant  
868 selection across all elevation pairs at that azimuth. (This is because of our finding that spatial  
869 azimuth is encoded topographically along the rostrocaudal axis of the Imc, and all the elevations  
870 at a given azimuth are encoded by the neurons in the coronal plane at the appropriate point along  
871 the rostrocaudal axis; Fig. 2 and Supplementary Fig. 3). A multilobe neuron that shares at least  
872 one of its RF lobes, but not all, with another neuron in the solution set is said to satisfy the  
873 experimentally testable version of the lobe-overlap property. To test this property in data, we  
874 first obtained the set of discrete elevational locations encoded by Imc neurons in a solution set  
875 (coronal plane). We did this by quantizing, at a resolution of  $3^\circ$  (to match theory and model; see  
876 main text related to Fig. 3), the maximum elevation range encoded by their RFs combined. Next,  
877 an RF lobe of a multilobed Imc neuron was said to overlap with the RF of another neuron if there  
878 existed a location within the former's half-max extent that also lay within the half-max extent of  
879 the latter's RF. The fraction of multilobed Imc RFs in each coronal plane that satisfy this testable  
880 version of the optimized lobe-overlap property is shown in Fig. 5c. (This testable version of the  
881 lobe-overlap property was necessary because of the inherent infeasibility of recording from all  
882 Imc neurons in a coronal section, i.e., from all the neurons in a 'solution set'. Specifically, the  
883 small ML extent of the Imc ( $<350 \mu\text{m}$ ), coupled with the thickness of the electrode ( $250 \mu\text{m}$ ) that  
884 was used to reliably target the deep Imc ( $\sim 16 \text{ mm}$  below brain surface), limited us to one  
885 dorsoventral penetration within a coronal section. This made recording from all Imc neurons in a  
886 given section unviable. The average # neurons recorded per section =  $3.44 \pm 0.47$ .

887 ***The 'combinatorial' property (property #3).***



888 (A) “Assorted neural subset” feature: Distant neurons are recruited to achieve selection for  
889 nearby locations, and nearby neurons are recruited to achieve selection for distant locations. To  
890 test for this feature, we divide the elevation range (L locations) into three parts, the upper L/3,  
891 middle L/3 and lower L/3 locations. Two locations are said to be ‘nearby’ if the distance  
892 between them is  $\leq L/3$ , and ‘distant’ if the distance between them is  $\geq 2*L/3$ . Similarly, two  
893 neurons are said to be nearby if the distance between them is  $\leq (N-1)/3$ , and distant, if their  
894 distance is  $\geq 2*(N-1)/3$ . We then ask if distant neurons are recruited for a nearby location-pair  
895 (LP), and vice-versa. Since there is no meaningful functional ordering of multilobe neurons  
896 owing to the lack of topography in the encoding of elevation, we must test these questions across  
897 permutations of the ordering of Imc neurons within a solution.

898 Model: First, we tested if distant neurons are recruited for a nearby location-pair. We did so by  
899 computing the following metric (eq. (12)) for each (L, N\*) (Fig. 4f).

$$900 \quad d(\text{nearby LP}) = \left[ \min_{\text{solutions}} \left\{ \min_{\text{permutations}} \left( \max_{\text{nearby LP}} (d) \right) \right\} \right] \quad - (12)$$

901 Here, ‘d’ is the maximum distance between the neurons recruited for solving selection for  
902 a given nearby location-pair in a given solution. The maximum of this across all nearby location-  
903 pairs yields the farthest distance between neurons recruited to solve selection for any nearby  
904 location-pair. The minimum of this value across permutations of neurons in the solution, and  
905 across all solutions, yields  $d(\text{nearby LP})$  for that (L, N\*).

906 For L=5 (N\*=4), we tested this exhaustively for all possible permutations (4!). However,  
907 for L = 20 (N\* = 14) and L = 40 (N\* = 27), the number of permutations is very large (14! = 8.7  
908  $\times 10^{10}$  and 27! = 1.08  $\times 10^{28}$ ). Because it was infeasible to test all possible permutations in these

909 cases, we tested a subset of permutations (n=1000) that was selected randomly from the set of all  
910 the possible permutations using the ‘*randperm*’ function in MATLAB.

911 For each (L, N\*), we calculated the normalized minimum distance between neurons  
912 recruited for selection at distant location-pairs as shown in eq. (13), and plotted it in  
913 Supplementary Fig. 5e.

$$914 \quad d_{norm}(nearby LP) = \frac{d(nearby LP) - d_{min}}{d_{max} - d_{min}} \quad - (13)$$

915 Here,  $d_{max}$  (= N\*-1) and  $d_{min}$  (= 1) are the maximum and minimum possible distances  
916 between neurons in a solutions set consisting of N\* neurons. We found that in every case, this  
917 normalized distance was high (>0.66; the normalized cut-off value chosen for defining ‘distant’  
918 neurons).

919 Next, we tested if nearby neurons are recruited for a distant location-pair, using a metric  
920 constructed with a logic similar to that used above:

$$921 \quad d(distant LP) = \left[ \max_{solutions} \left\{ \max_{permutations} \left( \min_{distant LP} (d) \right) \right\} \right] \quad - (14)$$

$$922 \quad d_{norm}(distant LP) = \frac{d(distant LP) - d_{min}}{d_{max} - d_{min}} \quad - (15)$$

923 For each (L, N\*), we calculated the normalized maximum distance between neurons  
924 recruited for selection at distant LPs (eq. (15)), and plotted the results in Supplementary Fig. 5f.  
925 We found that in every case, this normalized distance was small (<0.33; the normalized cut-off  
926 value chosen for defining ‘nearby’ neurons).

927 Data: For Imc neurons in each solution set (coronal plane), we obtained the range of discretized  
928 elevation values encoded as before (resolution of 3°), and then calculated the normalized  
929 minimum distance between nearby neurons and the normalized maximum distance between

930 distant neurons using the Eq. (13) and (15) above. Note that for the notions of nearby neurons  
931 and distant neurons, there need to be at least 3 neurons in the solution set so that the maximum  
932 distance is 2 and the minimum distance is 1. Out of 14 coronal planes that contained multilobe  
933 neurons, 8 had  $\geq 3$  neurons. The results from these 8 planes are plotted in Fig. 5f.

934 (B) “Extensive intersection” feature. Location-pairs occupying distant portions of space recruit  
935 shared neurons to solve selection at each pair. Two location-pairs are said occupy distant  
936 portions of (elevation) space if one location-pair lies within the upper third of the locations  
937 (upper  $L/3$ ) and the other lies within the lower third of the locations (lower  $L/3$ ). Since  
938 intersection between the neural subsets is independent of the ordering of the neurons, we do not  
939 need to test this for all permutations of neuron orderings. Model: For every optimal solution at a  
940 given  $(L, N^*)$ , we tested if there existed two location-pairs in distant portions of space such that  
941 the neural subsets recruited to solve selection at each location-pair shared at least one neuron.  
942 The fraction of optimal solutions that satisfied this property is plotted as a function of  $(L, N^*)$  in  
943 Supplementary Fig. 5g; the fraction is uniformly 100%.

944 Data: For Imc neurons in each solution set (coronal plane), we obtained the range of discretized  
945 elevation values encoded as before (resolution of  $3^\circ$ ). We then tested if these neurons satisfied  
946 the extensive-intersection property as described for the model. Of the 14 coronal planes at which  
947 neurons were recorded, in 6 cases, the encoded locations included two location-pairs that  
948 occupied distant locations. The fraction of these 6 coronal planes that satisfied the extensive  
949 intersection property is shown in Fig. 5g (100%).

#### 950 **Wiring and metabolic costs of location-invariant selection in the Imc-OT circuit (Fig. 6).**

951 Wiring cost: The wiring cost for location-invariant selection by the Imc is estimated as the cost  
952 of generating axonal projections (‘wires’) between each Imc neuron and each of its target OTid

953 neurons. This cost depends both on the number of locations that each neuron must suppress and  
 954 the number of neurons in the population. Assuming that the lengths of wires from Imc to each  
 955 OTid neuron is approximately equal (say 1 unit each, without loss of generality), we can estimate  
 956 the total wiring length and consequently the total wiring cost using Eq. (16) below (see <sup>22</sup>).

$$957 \quad \text{Wiring Cost}(L, N^*, k_{max}) = \left( \sum_{i=1}^{N^*} (\# \text{Locations suppressed by neuron } i) \right)^p \quad - (16)$$

958 The summation is the total wiring length of all the wires from the Imc neurons to the OTid  
 959 population. 'p' is a power term such that typically  $1 < p < 4$  (see <sup>22</sup>). This quantity is computed  
 960 for each optimal solution (obtained over the 1000 runs) for a given (L, N\*, k<sub>max</sub>) triplet, and the  
 961 results are plotted in Fig. 6a.

962 Metabolic cost: The metabolic cost for location-invariant selection by the Imc is estimated as the  
 963 cost of generating and broadcasting spikes to the OTid to achieve competitive suppression. This  
 964 depends on the number of neurons activated by a stimulus at each of the L locations, as well as  
 965 the number of OTid locations to which each activated neuron delivers inhibition. If the cost of  
 966 suppressing one OTid location using 1 spike is 1 unit, then the total metabolic cost for the circuit  
 967 for a given firing rate *f* is given by Eq. (17) below (using a similar formula as for wiring cost).

$$968 \quad \begin{aligned} & \text{Metabolic cost}(L, N^*, k_{max}, f) \\ & = \left( \frac{f}{L} \sum_{j=1}^L \sum_{i=1}^{N^*} (\# \text{Locations suppressed by neuron } i \text{ when stimulus is placed at location } j) \right)^q \end{aligned} \quad - (17)$$

969 Note that the term in the inner summation is non-zero only for activated neurons when the  
 970 stimulus is placed at location *j*. 'q' is a power term chosen such that  $1 < q < 4$  (similar to the  
 971 wiring cost). This quantity is computed for each optimal solution (obtained over the 1000 runs)

972 for a given ( $L, N^*, k_{max}, f = 10 \text{ Hz}$ ), and the results plotted in Fig. 6b.

973 **Total cost:** The total cost for any solution is calculated as a weighted combination of the wiring  
974 cost (weight =  $\alpha$ ) and the metabolic cost (weight =  $\beta$ ) as given in Eq. (18) below. There are five  
975 parameters in this summation ( $\alpha, p, \beta, q$  and  $f$ ). The results are plotted for  
976  $\alpha = 20, p = 2.5, \beta = 80, q = 2.42$  for firing rates of  $f=10 \text{ Hz}$  (blue curve) and  $f=80 \text{ Hz}$  (red  
977 curve) in Fig. 6c.

$$\begin{aligned} \text{Total cost}(L, N^*, k_{max}, f) = & (\alpha * \text{Wiring cost}(L, N^*, k_{max})) + \\ & (\beta * \text{Metabolic cost}(L, N^*, k_{max}, f)) \quad - (18) \end{aligned}$$

978  
979 **Data analyses and statistical tests.** All analyses were carried out with custom MATLAB code.  
980 Parametric or non-parametric statistical tests were applied based on whether the distributions  
981 being compared were Gaussian or not, respectively (Lilliefors test of normality). The Holm-  
982 Bonferroni correction was used to account for multiple comparisons. Data shown as  $a \pm b$  refer  
983 to mean  $\pm$  s.e.m, unless specified otherwise. The ‘\*’ symbol indicates significance at the 0.05  
984 level (after corrections for multiple comparisons, if applicable). Correlations between RF centers  
985 (azimuth) and electrode measurement positions (rostrocaudal/ dorsoventral) were tested using  
986 Spearman’s rank correlation coefficient (*corr* command in MATLAB with the Spearman option).  
987 **Code and data availability.** Software code and the data that support the findings of this study  
988 are available from the corresponding author upon reasonable request.

989

## 990 **References**

991 1 Desimone, R. & Duncan, J. Neural mechanisms of selective visual attention. *Annu Rev*  
992 *Neurosci* **18**, 193-222 (1995).

- 993 2 Fecteau, J. H. & Munoz, D. P. Salience, relevance, and firing: a priority map for target  
994 selection. *Trends Cogn Sci* **10**, 382-390 (2006).
- 995 3 Knudsen, E. I. Fundamental components of attention. *Annu Rev Neurosci* **30**, 57-78 (2007).
- 996 4 Graybiel, A. M. A satellite system of the superior colliculus: the parabigeminal nucleus and  
997 its projections to the superficial collicular layers. *Brain Res* **145**, 365-374, doi:0006-  
998 8993(78)90870-3 [pii] (1978).
- 999 5 Jiang, Z. D., King, A. J. & Moore, D. R. Topographic organization of projection from the  
1000 parabigeminal nucleus to the superior colliculus in the ferret revealed with fluorescent latex  
1001 microspheres. *Brain Res* **743**, 217-232 (1996).
- 1002 6 Wang, Y., Major, D. E. & Karten, H. J. Morphology and connections of nucleus isthmi pars  
1003 magnocellularis in chicks (*Gallus gallus*). *J Comp Neurol* **469**, 275-297 (2004).
- 1004 7 Sereno, M. I. & Ulinski, P. S. Caudal topographic nucleus isthmi and the rostral  
1005 nontopographic nucleus isthmi in the turtle, *Pseudemys scripta*. *J Comp Neurol* **261**, 319-346  
1006 (1987).
- 1007 8 Knudsen, E. I. Auditory and visual maps of space in the optic tectum of the owl. *J. Neurosci.*  
1008 **2**, 1177-1194 (1982).
- 1009 9 Meredith, M. A. & Stein, B. E. Visual, auditory, and somatosensory convergence on cells in  
1010 superior colliculus results in multisensory integration. *J Neurophysiol* **56**, 640-662 (1986).
- 1011 10 Lovejoy, L. P. & Krauzlis, R. J. Inactivation of primate superior colliculus impairs covert  
1012 selection of signals for perceptual judgments. *Nat Neurosci* **13**, 261-266 (2010).
- 1013 11 McPeck, R. M. & Keller, E. L. Deficits in saccade target selection after inactivation of  
1014 superior colliculus. *Nat Neurosci* **7**, 757-763 (2004).
- 1015 12 Mysore, S. P., Asadollahi, A. & Knudsen, E. I. Global inhibition and stimulus competition in  
1016 the owl optic tectum. *J Neurosci* **30**, 1727-1738 (2010).
- 1017 13 Mysore, S. P., Asadollahi, A. & Knudsen, E. I. Signaling of the strongest stimulus in the owl  
1018 optic tectum. *J Neurosci* **31**, 5186-5196 (2011).
- 1019 14 Rizzolatti, G., Camarda, R., Grupp, L. A. & Pisa, M. Inhibitory effect of remote visual  
1020 stimuli on visual responses of cat superior colliculus: spatial and temporal factors. *J*  
1021 *Neurophysiol* **37**, 1262-1275 (1974).
- 1022 15 Marin, G. *et al.* A cholinergic gating mechanism controlled by competitive interactions in the  
1023 optic tectum of the pigeon. *J Neurosci* **27**, 8112-8121 (2007).

- 1024 16 Mysore, S. P. & Knudsen, E. I. A shared inhibitory circuit for both exogenous and  
1025 endogenous control of stimulus selection. *Nat Neurosci* **16**, 473-478 (2013).
- 1026 17 Wang, Y. C. & Frost, B. J. Visual response characteristics of neurons in the nucleus isthmi  
1027 magnocellularis and nucleus isthmi parvocellularis of pigeons. *Exp Brain Res* **87**, 624-633  
1028 (1991).
- 1029 18 Li, D. P., Xiao, Q. & Wang, S. R. Feedforward construction of the receptive field and  
1030 orientation selectivity of visual neurons in the pigeon. *Cereb Cortex* **17**, 885-893 (2007).
- 1031 19 Rodriguez, A. & Laio, A. Machine learning. Clustering by fast search and find of density  
1032 peaks. *Science* **344**, 1492-1496, doi:10.1126/science.1242072 (2014).
- 1033 20 Tibshirani, R., Walther, G. & Hastie, T. Estimating the number of clusters in a dataset via the  
1034 gap statistic. *J. R. Statist. Soc. B* **63**, 411-423 (2001).
- 1035 21 Garcia-Cabezas, M. A., John, Y. J., Barbas, H. & Zikopoulos, B. Distinction of Neurons,  
1036 Glia and Endothelial Cells in the Cerebral Cortex: An Algorithm Based on Cytological  
1037 Features. *Front Neuroanat* **10**, 107, doi:10.3389/fnana.2016.00107 (2016).
- 1038 22 Chen, B. L., Hall, D. H. & Chklovskii, D. B. Wiring optimization can relate neuronal  
1039 structure and function. *Proc Natl Acad Sci U S A* **103**, 4723-4728,  
1040 doi:10.1073/pnas.0506806103 (2006).
- 1041 23 Goddard, C. A., Huguenard, J. & Knudsen, E. Parallel midbrain microcircuits perform  
1042 independent temporal transformations. *J Neurosci* **34**, 8130-8138,  
1043 doi:10.1523/JNEUROSCI.4399-13.2014 (2014).
- 1044 24 Wang, Y., Luksch, H., Brecha, N. C. & Karten, H. J. Columnar projections from the  
1045 cholinergic nucleus isthmi to the optic tectum in chicks (*Gallus gallus*): a possible substrate  
1046 for synchronizing tectal channels. *J Comp Neurol* **494**, 7-35 (2006).
- 1047 25 Lee, C., Rohrer, W. H. & Sparks, D. L. Population coding of saccadic eye movements by  
1048 neurons in the superior colliculus. *Nature* **332**, 357-360, doi:10.1038/332357a0 (1988).
- 1049 26 Lewis, J. E. & Kristan, W. B., Jr. A neuronal network for computing population vectors in  
1050 the leech. *Nature* **391**, 76-79, doi:10.1038/34172 (1998).
- 1051 27 Georgopoulos, A. P., Schwartz, A. B. & Kettner, R. E. Neuronal population coding of  
1052 movement direction. *Science* **233**, 1416-1419 (1986).
- 1053 28 Ma, W. J., Beck, J. M., Latham, P. E. & Pouget, A. Bayesian inference with probabilistic  
1054 population codes. *Nat Neurosci* **9**, 1432-1438 (2006).

- 1055 29 Sicard, G. & Holley, A. Receptor cell responses to odorants: similarities and differences  
1056 among odorants. *Brain Res* **292**, 283-296 (1984).
- 1057 30 Hafting, T., Fyhn, M., Molden, S., Moser, M. B. & Moser, E. I. Microstructure of a spatial  
1058 map in the entorhinal cortex. *Nature* **436**, 801-806, doi:10.1038/nature03721 (2005).
- 1059 31 Towse, B. W., Barry, C., Bush, D. & Burgess, N. Optimal configurations of spatial scale for  
1060 grid cell firing under noise and uncertainty. *Philos Trans R Soc Lond B Biol Sci* **369**,  
1061 20130290, doi:10.1098/rstb.2013.0290 (2014).
- 1062 32 Mao, D., Kandler, S., McNaughton, B. L. & Bonin, V. Sparse orthogonal population  
1063 representation of spatial context in the retrosplenial cortex. *Nature communications* **8**, 243,  
1064 doi:10.1038/s41467-017-00180-9 (2017).
- 1065 33 Olshausen, B. A. & Field, D. J. Sparse coding with an overcomplete basis set: a strategy  
1066 employed by V1? *Vision Res* **37**, 3311-3325 (1997).
- 1067 34 Kruskal, J. B., Jr. On the shortest spanning subtree of a graph and the traveling salesman  
1068 problem. *Proc Amer Math Soc* **7**, 48-50 (1956).
- 1069 35 Lawler, E. L., Lenstra, J. K., Rinnooy Kan, A. H. G. & Shmoys, D. B. The traveling  
1070 salesman problem. A guided tour of combinatorial optimization. *J Oper Res Soc* **37**, 536-536  
1071 (1985).
- 1072 36 Fee, M. S., Mitra, P. P. & Kleinfeld, D. Automatic sorting of multiple unit neuronal signals  
1073 in the presence of anisotropic and non-Gaussian variability. *J Neurosci Methods* **69**, 175-188  
1074 (1996).
- 1075 37 Schlueter, M., Gerdt, M. & Ruckmann, J. J. A numerical study of MIDACO on 100 MINLP  
1076 benchmarks. *Optim* **61**, 873-900 (2012).

1077

1078



1079 **Supplementary Figures**

1080

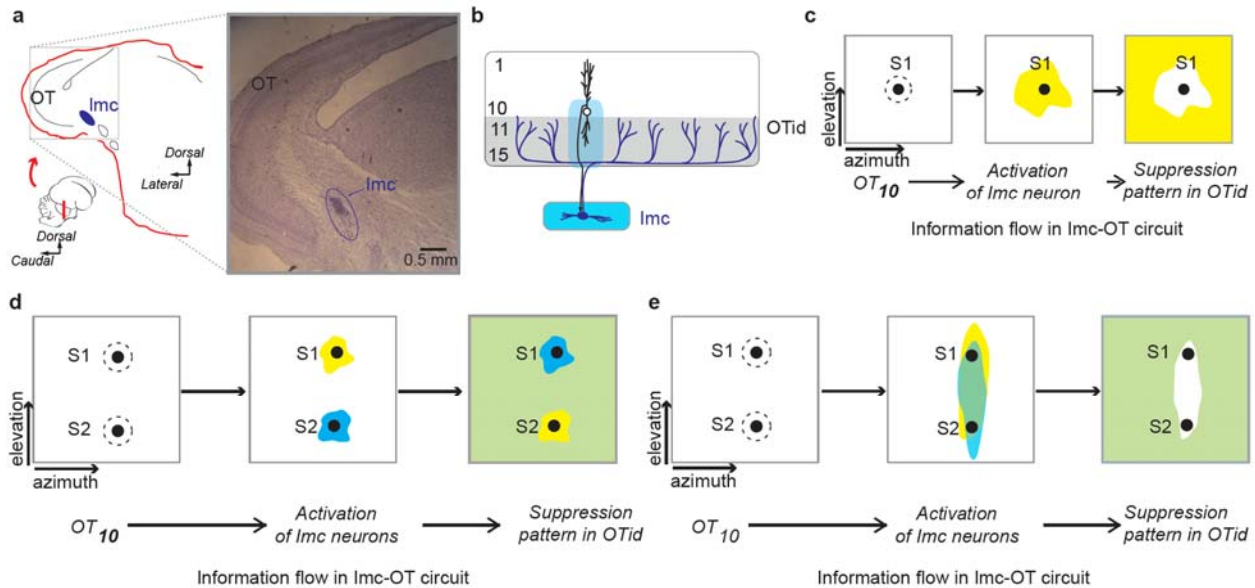

1081

1082 **Supplementary Fig. 1. Anatomical connectivity and information flow between the Imc and**

1083 **optic tectum (OT). Related to Fig. 1. (a) Left:** Cartoon showing side view of barn owl brain

1084 (inset), and coronal section taken along the indicated line in inset. *Right:* Nissl stained, coronal

1085 section of midbrain depicting the multilayered optic tectum (OT) and the isthmi pars

1086 magnocellularis (Imc). The OT<sub>10</sub> is seen as a darkly stained arc of cell bodies. The Imc is a long

1087 and narrow (baguette-like) structure: 2800  $\mu\text{m}$  long rostrocaudally and 350  $\mu\text{m}$  mediolaterally;

1088 appears in transverse sections as a 700- $\mu\text{m}$  x 350- $\mu\text{m}$  elliptical disk of neurons (blue oval)<sup>16</sup>. The

1089 long, rostrocaudal axis of the Imc is parallel to the rostrocaudal axis of the OT. Dark area in the

1090 dorsal portion of Imc: electrolytic lesion following stereotactic and electrophysiologically-based

1091 targeting of Imc. **(b)** Schematic of anatomical connectivity between the Imc and OT. Imc

1092 neurons receive input from a focal portion of OT<sub>10</sub> (black neuron), but project broadly back (blue

1093 lines) to the OTid sparing just the portion of the space map providing input (light blue shading

1094 across OT layers)<sup>6</sup>. All layers of OT are known to represent space topographically, but how the  
1095 Imc represents space is not well understood (see also (e)). **(c)** Schematic of information flow  
1096 through the OT<sub>10</sub>-Imc-OTid circuit showing the functional, spatial-inverse operation executed by  
1097 established Imc-OT connectivity<sup>6</sup>. Maps of visual space in the OT<sub>10</sub> (*left*), Imc (*middle*) and  
1098 OTid (*right*). For purposes of illustrating the spatial inverse operation, Imc RFs are assumed to  
1099 be large with an unknown shape (yellow shading). A visual stimulus S1 at location 1 activates  
1100 the space map in OT<sub>10</sub> (left; dashed circle - RF of activated neuron). This, in turn, activates an  
1101 Imc neuron (middle; yellow represents assumed RF of activated Imc neuron), which delivers  
1102 inhibition to all locations in the OTid space map that are outside the RF of the activated Imc  
1103 neuron (right; yellow shading)<sup>6,15,16</sup>. **(d)** Schematic representation of stimulus selection in the  
1104 OTid under the assumption that Imc RFs are small, resembling OT<sub>10</sub> RFs. *Left*: Shown are two  
1105 stimuli S1 and S2, at locations 1 and 2, respectively, which activate corresponding neurons in the  
1106 OT<sub>10</sub> space map. *Middle*: Imc neuron activated by S1 (yellow RF), and Imc neuron activated by  
1107 S2 (blue RF). *Right*: Combined pattern of suppression generated in the OTid by the activated Imc  
1108 neurons: each neuron delivers suppression to locations outside its RF; green = yellow + blue.  
1109 Each stimulus successfully suppresses the other – S2 lies within the yellow zone of suppression  
1110 produced by S1, and vice-versa – implementing selection for stimuli at these two locations.  
1111 Similarly, if every spatial location was encoded by an Imc neuron with a small, OT<sub>10</sub> like RF  
1112 (and with space-inverting connectivity with the OT), then stimulus selection in the OTid would  
1113 be achieved successfully for all pairs of locations (the ‘copy-and-paste’ strategy described in the  
1114 text). **(e)** Same as (d), but with Imc RFs that are large and elongated vertically, covering almost  
1115 the entire elevational extent, as reported in the literature<sup>17,18</sup>. Shown in the middle panel are the  
1116 RFs of two Imc neurons, in yellow and blue, respectively. *Left*: As in (d). *Middle*: S1 activates

1117 both Imc neurons, and so does S2. *Right*: Resulting patterns of inhibition in the OTid space map;  
1118 green = yellow + blue; large swaths of space are left without inhibition (white region in right  
1119 panel, corresponds to intersection of the two RFs). Specifically, neither stimulus is suppressed by  
1120 the other even though the two stimuli are well separated in elevation (shown here to be  
1121 approximately 60° apart), preventing stimulus selection along the elevation. Large, vertically  
1122 elongated Imc RFs, therefore, are unable to support spatial selection in the OTid across all  
1123 elevational locations. This is an apparent paradox in terms of Imc-OT function because the OTid  
1124 is known to exhibit location-invariant selection, including when stimuli are <10° apart in  
1125 azimuth or elevation <sup>10,12-14</sup>, with Imc driving this global competitive selection <sup>16</sup>.

1126

1127

1128

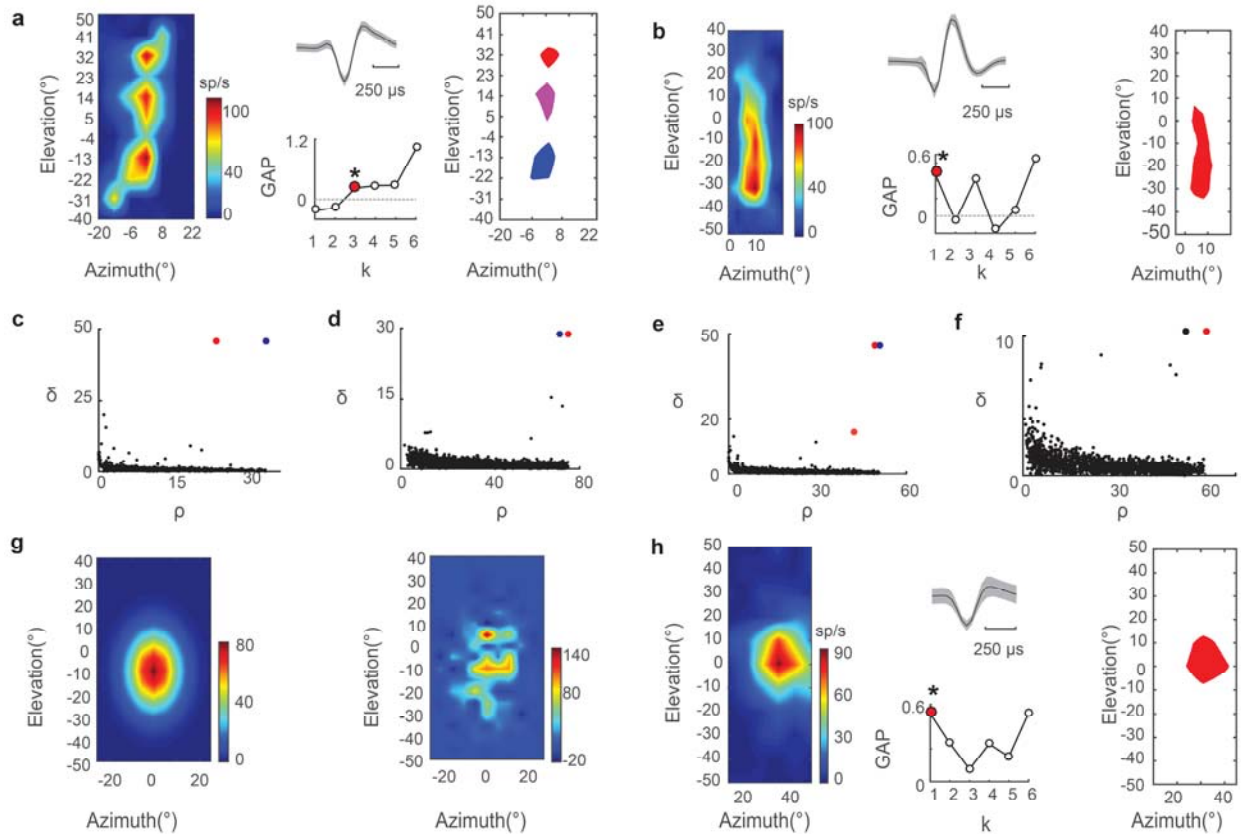

1129

1130 **Supplementary Fig. 2. Analysis of visual RFs of example Imc and OTid neurons. Related to**

1131 **Fig. 1. (a)** Three-lobed visual RF of an example Imc neuron. (*Left*) Color coded rate map of RF.

1132 (*Middle, top*) spike waveform for the neuron. (*Middle, bottom*) GAP statistic plot. (*Right*) Half-

1133 max extents of the 3 lobes identified by model selection with the gap statistic. (**b**) Single-lobed

1134 visual RF of an Imc neuron; conventions same as (a). (**c**) Density peaks clustering method.

1135 Scatter plot of local density ( $\rho$ ) around each datapoint in Fig. 1c vs. the distance of that datapoint

1136 from other points that have higher local density ( $\delta$ ). (For the point with highest local density,  $\delta$  is

1137 conventionally taken as the maximum distance of the point from all other points). Points that

1138 have both high local density (large  $\rho$  value) and that are far away from other points of high local

1139 density (large  $\delta$  value) are potential cluster centers; Red and blue points in this example. Red

1140 point corresponds to the center of top cluster, and blue point, the center of lower cluster shown in

1141 Fig. 1d. **(d-f)** Same as (c), but for RFs in Figs. 1f, Supplementary Figs. 2a and 2b respectively.  
1142 **(g)** Effect of sampling resolution and neuronal noise on detection of optimal number of lobes in  
1143 the data. *(Left)* The simulated single-lobed 2D Gaussian RF used for the Monte-Carlo analysis in  
1144 Fig. 1j (Methods). Shown are mean firing rates at different locations. *(Right)* Plot of the RF  
1145 obtained when it is re-simulated after adding noise (Fano-factor = 30), and sampled with step-  
1146 sizes =  $5^\circ$  in azimuth and elevation. This sampled RF was identified as having two lobes by our  
1147 analysis pipeline (conversion to distribution of points on plane, density peak clustering, followed  
1148 by gap statistic model selection), which is incorrect because the true underlying Gaussian RF  
1149 was single-lobed. This illustrates how noisy neural responses can lead to the erroneous  
1150 conclusion that a single-lobed RF is multilobed. **(h)** 2D visual RF of an example OTid neuron.  
1151 Conventions as in (a), (b). The RF is single lobed.

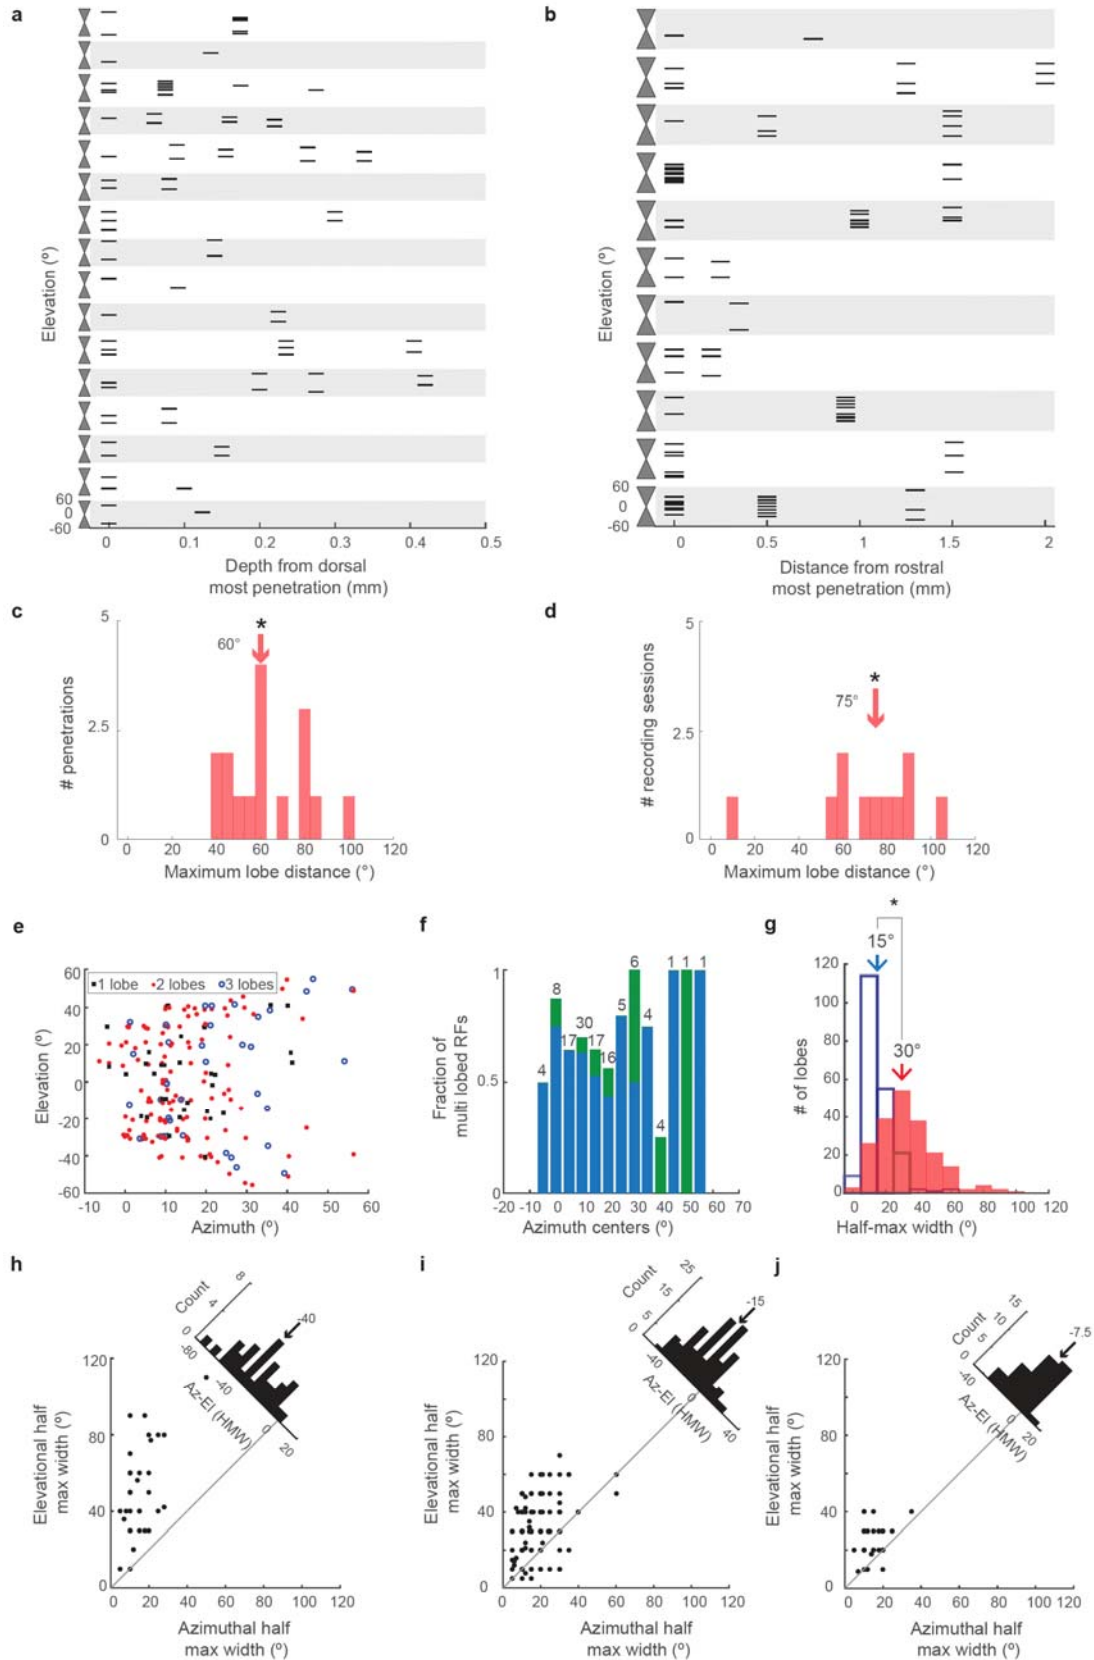

1152

1153 **Supplementary Fig. 3. Detailed analysis of the organization and structure of RF lobes of**  
1154 **Imc neurons. . Related to Fig. 2. (a)** Plot of elevational centers (black horizontal ticks) of all  
1155 the visual RF lobes of all individual neurons recorded at a multiunit site, as a function of the  
1156 dorsoventral position of the electrode within the Imc along a penetration. Each horizontal band  
1157 (gray and white) band depicts a different penetration; the vertical extent of each band spans  $-60^\circ$   
1158 to  $+60^\circ$  in elevation. No systematic organization of elevational centers of RF lobes along the  
1159 dorsoventral as evidenced by widespread and irregular distribution of lobe centers at each depth  
1160 within a penetration. **(b)** Plot of elevational centers (black horizontal ticks) of all the visual RF  
1161 lobes of all individual neurons recorded at a multiunit site, as a function of the rostrocaudal  
1162 position of the electrode during that recording session. Each horizontal band (gray and white)  
1163 depicts a different recording session; the vertical extent of each band spans  $-60^\circ$  to  $+60^\circ$  in  
1164 elevation. No systematic organization of elevational centers of RF lobes along the rostrocaudal  
1165 axis, as evidenced by widespread and irregular distribution of lobe centers at each penetration  
1166 (within a recording session). **(c)** Histogram showing maximum distance between RF lobes  
1167 measured along each penetration (i.e., each horizontal band in (a)). \* indicates mean significantly  
1168 different from 0 ( $p < 0.001$ ); one tailed t-test. **(d)** Histogram showing maximum distance  
1169 between RF lobes measured across all penetrations made along the rostrocaudal axis in each  
1170 recording session (i.e., each horizontal band in (b)). \* indicates mean significantly different from  
1171 0 ( $p < 0.001$ ); one tailed t-test. **(e, f)** Multilobe neurons were found at all tested azimuths. (e)  
1172 Scatter plot of the azimuthal and elevation centers of the individual lobes of multilobed RFs of  
1173 all neurons. (f) Fraction of measured RFs that were multilobed, plotted as a function of the  
1174 azimuthal center of the RF (blue corresponds to 2-lobed Imc RFs and green to 3-lobed Imc RF).  
1175 **(g)** RF lobes of Imc neurons are elongated in elevation. Histogram of azimuthal (open) and

1176 elevational (red) half-max widths of all the RF lobes across all recorded neurons. Arrows  
 1177 indicate median values. \* indicated that lobes are larger in elevation than in azimuth (ranksum  
 1178 test  $p < 10^{-25}$ ). (h, i, j) Lobes of single-lobed RFs are taller (more elongated in elevation) than  
 1179 those of two-lobed RFs, which are in turn taller than those of three-lobed RFs. Scatter plot of  
 1180 elevational vs. azimuthal half-max widths of single-lobed RFs (h), two-lobed RFs (i), and three-  
 1181 lobed RFs (j). *Insets*: Histogram of data points projected onto the line perpendicular to the line of  
 1182 unity. The median values of the histograms increase (and approach zero) as we go from panel h  
 1183 (single-lobed RFs) to j (three-lobed RFs). HMW: Half-max width.

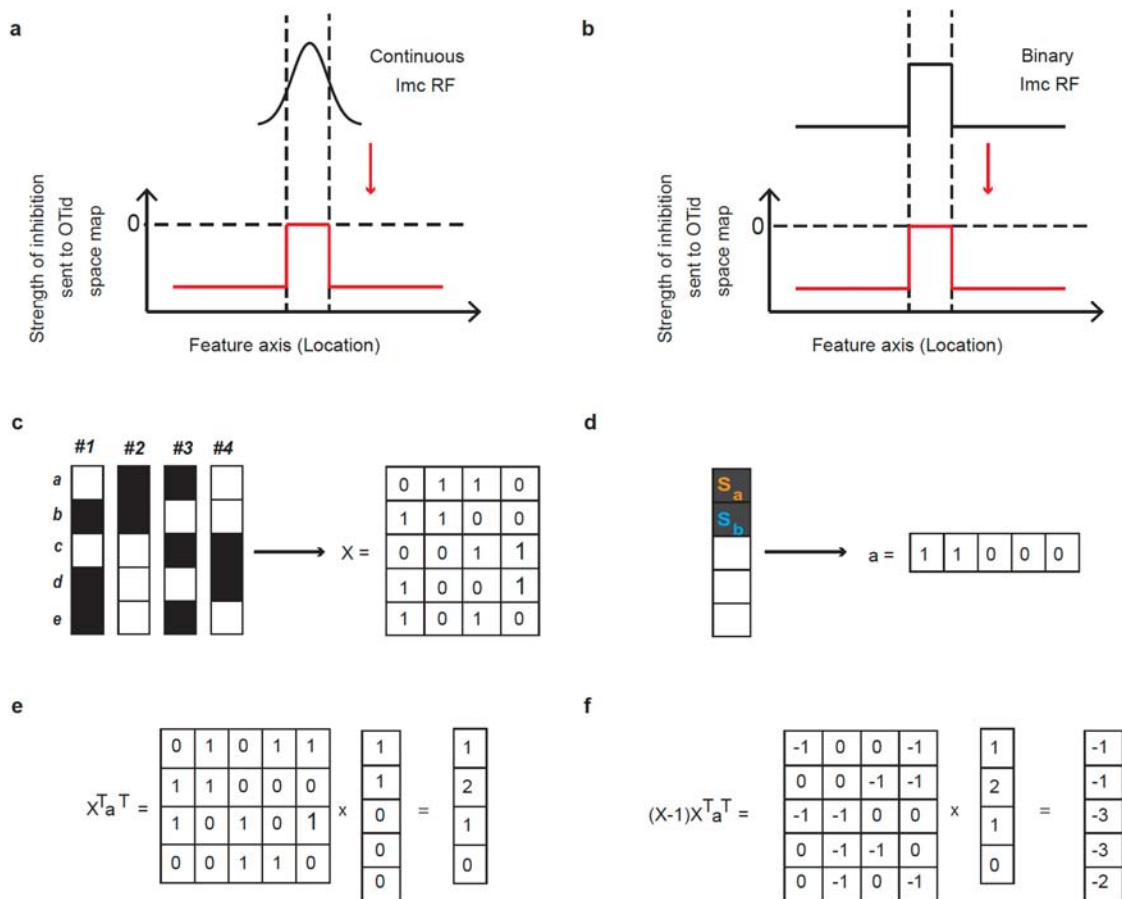

1184

1185 **Supplementary Fig. 4. Setup of location-invariant stimulus selection as an optimization**

1186 **problem. Related to Fig. 4. (a-b) Patterns of spatial inhibition sent by the Imc to OT by**



1187 continuous Imc RFs (biologically-consistent), vs. binary Imc RFs (simplified abstraction for  
1188 modeling purposes). (a) Top: Schematic of an Imc RF that encodes locations using continuous  
1189 values of firing rates. Bottom: Pattern of inhibition sent by the Imc RF to the OTid space map  
1190 based on the space inverting anatomy between the Imc and OT. Without loss of generality,  
1191 locations outside the half-max extent of the Imc RF are considered to be spared by Imc spatial  
1192 inhibition. (b) Same as (a), but when the Imc RF is assumed to be binary at the half-max level of  
1193 the RF (Methods). The spatial pattern of Imc inhibition in (b) is nearly identical to that in (a)  
1194 (with the exception that the strength of inhibition in a gets scaled based on the specific position  
1195 of the stimulus within the RF half-max.) (c) Left: RF solutions (from Fig. 4a) obtained by the  
1196 optimization problem when  $L=5$  and  $N=4$ . Right: Same RFs represented as an  $L \times N$  matrix 'X'  
1197 for the optimization problem. (d) Left: Stimuli presented at locations  $a$  and  $b$  (from Fig. 4b).  
1198 Right: Stimuli pair represented as a row vector for the optimization problem. (e) The product  
1199  $X^T a^T$  results in a vector of length  $N \times 1$  whose  $j^{th}$  element equals the number of locations that  
1200 activate model neuron  $j$ . For instance, neuron #2 is activated by both  $S_a$  and  $S_b$ . So, the second  
1201 element of the vector  $X^T a^T$  is 2. (f) The product  $(X-1)X^T a^T$  results in a vector of length  $L \times 1$   
1202 whose  $j^{th}$  element equals the net inhibition sent by the Imc population to location  $j$  when the  
1203 stimuli are presented at locations indicated by vector  $a$ . For instance, the inhibition sent to  
1204 location  $b$  is -1 (by Imc neuron #3). So the second element of  $(X-1)X^T a^T$  is -1.

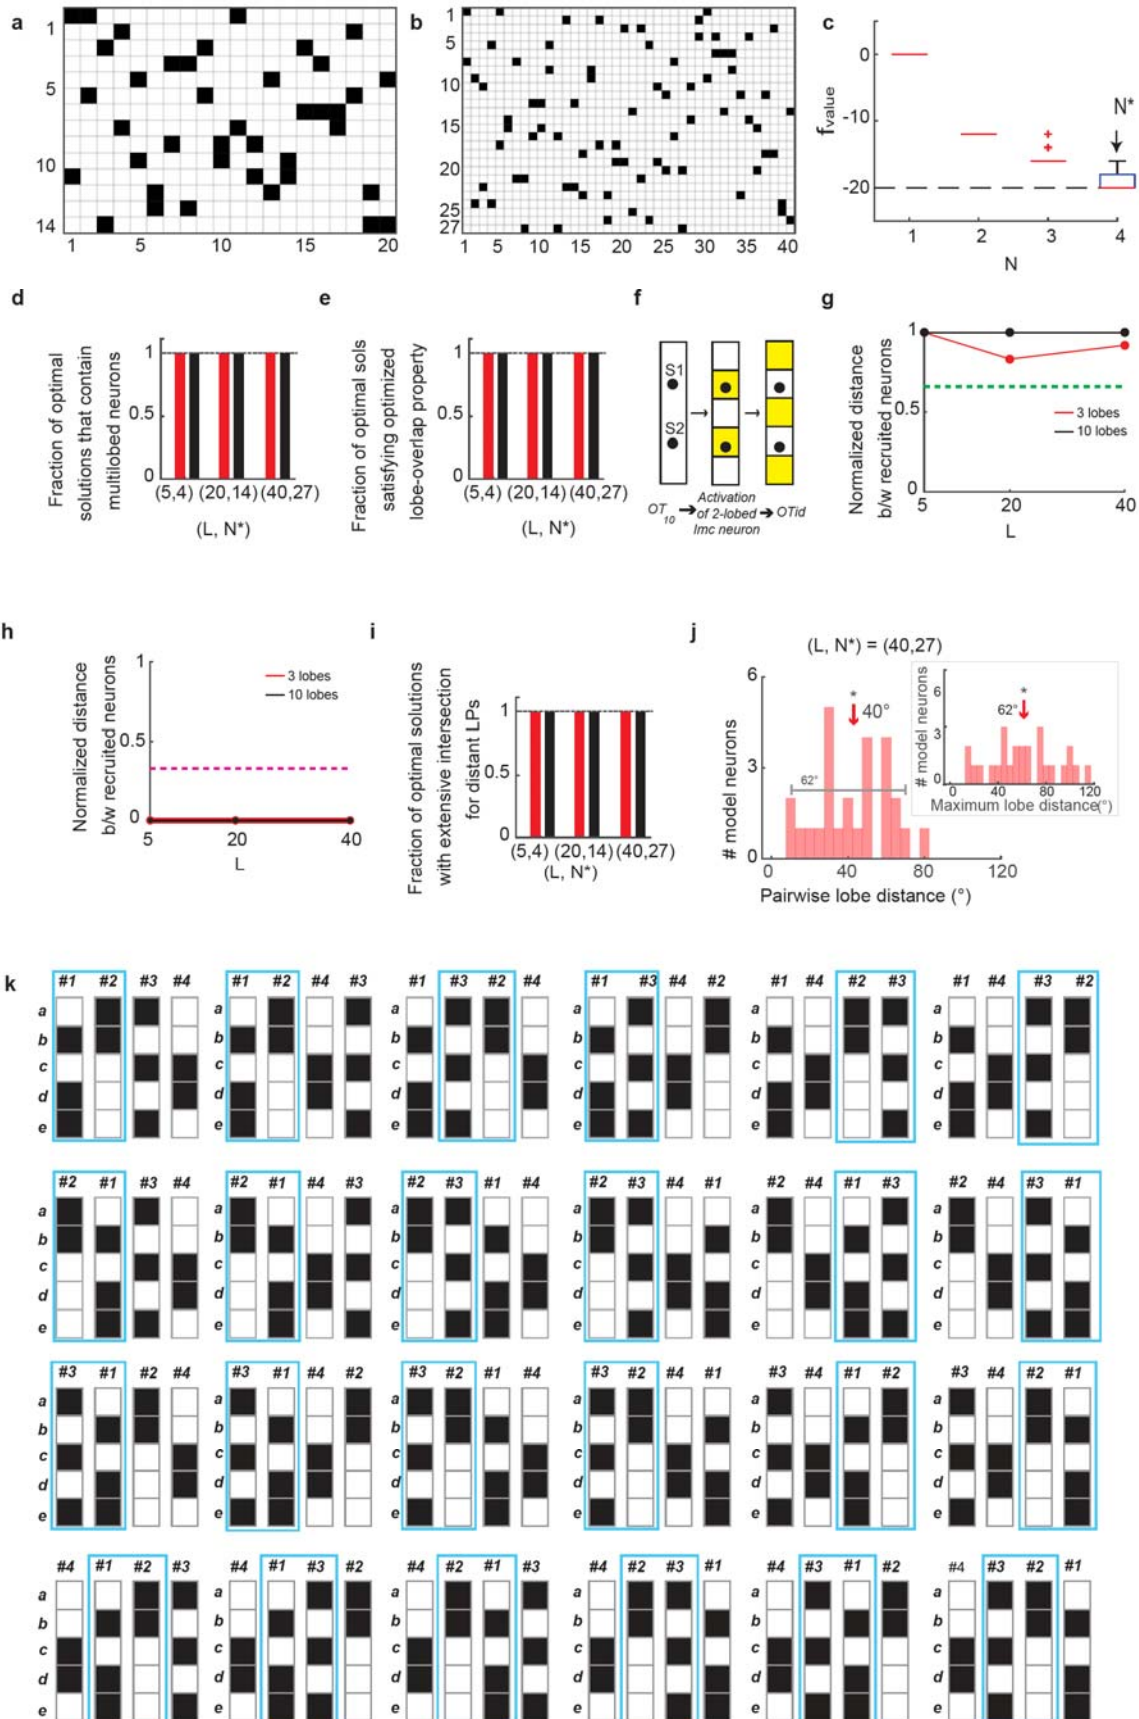

1206 **Supplementary Fig. 5. All optimal model solutions exhibit signature properties of**  
1207 **combinatorially optimized inhibition. Related to Fig. 4. (a)** Example optimal solution for  $(L,$   
1208  $N^*) = (20, 14)$ . Black pixels: Locations inside neurons' RF, White pixels: Locations outside  
1209 neurons' RF. **(b)** Example optimal solution for  $(L, N^*) = (40, 27)$ . Same convention as in (a). **(c)**  
1210 Minimum value of cost function achieved by the optimization model with  $L=5$  locations, plotted  
1211 as a function of number of Imc-like neurons in the model; optimization was run 1000 times for  
1212 each  $N$ . The minimum value progressively decreased as  $N$  increased, achieving the lowest  
1213 possible value that the cost function can achieve ( $-L(L-1)$ ;  $-20$  for  $L=5$ ) only when  $N=4$ . In other  
1214 words, the smallest number of neurons at which location-invariant selection is achievable by the  
1215 model, called  $N^*$ , was 4 when  $L=5$  locations. Therefore, neuronal savings, defined as  $L-N^*$ , was  
1216 1. **(d)** Fraction of optimal model solutions that had multilobed Imc neurons for all  $(L, N^*)$  pairs;  
1217 black bars –  $k_{\max}=3$ , red bars –  $k_{\max}=10$ . **(e)** Fraction of optimal model solutions that satisfy the  
1218 “optimized lobe-overlap” property. Same conventions as in (d). **(f)** Schematic plot illustrating the  
1219 need for the optimized lobe-overlap property for multilobed Imc neurons. Shown is a two-lobed  
1220 Imc neuron (*middle*). When stimuli  $S1$  and  $S2$  are placed such that they both lie within the RF of  
1221 this Imc neuron (*left*), the resulting zone of suppression generated by this Imc neuron in the OTid  
1222 spares both stimuli (*right*). Thus, selection for this location-pair cannot be achieved by just this  
1223 Imc neuron. **(g)** Minimum distance between neurons across model solutions and permutations  
1224 recruited for solving selection for nearby location-pairs plotted as fraction of the maximum  
1225 possible distance between neurons (Methods). Green dashed line: Distance cut-off for ‘distant’  
1226 neurons. **(h)** Maximum distance between neurons across model solutions and permutations  
1227 recruited for solving selection for distant location-pairs plotted as fraction of the maximum  
1228 possible distance between neurons (Methods). Magenta dashed line: Distance cut-off for

1229 ‘nearby’ neurons. **(i)** Fraction of optimal model solutions that satisfying the extensive  
1230 intersection property. Same conventions as in (d). **(j)** Histogram of distance between centers of  
1231 RF lobes within individual multilobed neurons for a randomly selected model solution for  $(L,$   
1232  $N^*, k_{\max}) = (40, 27, 3)$ . *Inset*: Maximum elevational distance between lobes of a multilobe neuron  
1233 for the same model solution. Lobes of neurons in model solutions were arbitrarily placed and  
1234 widely spread. \* indicates mean significantly different from 0 ( $p < 0.001$ ); one tailed t-test. **(k)** All  
1235 24 possible permutations of the model solution in Fig. 4a; same conventions as in Fig. 4a). For  
1236 each permutation, there is at least one pair of nearby neurons that encode distant locations  
1237 (indicated by blue box).

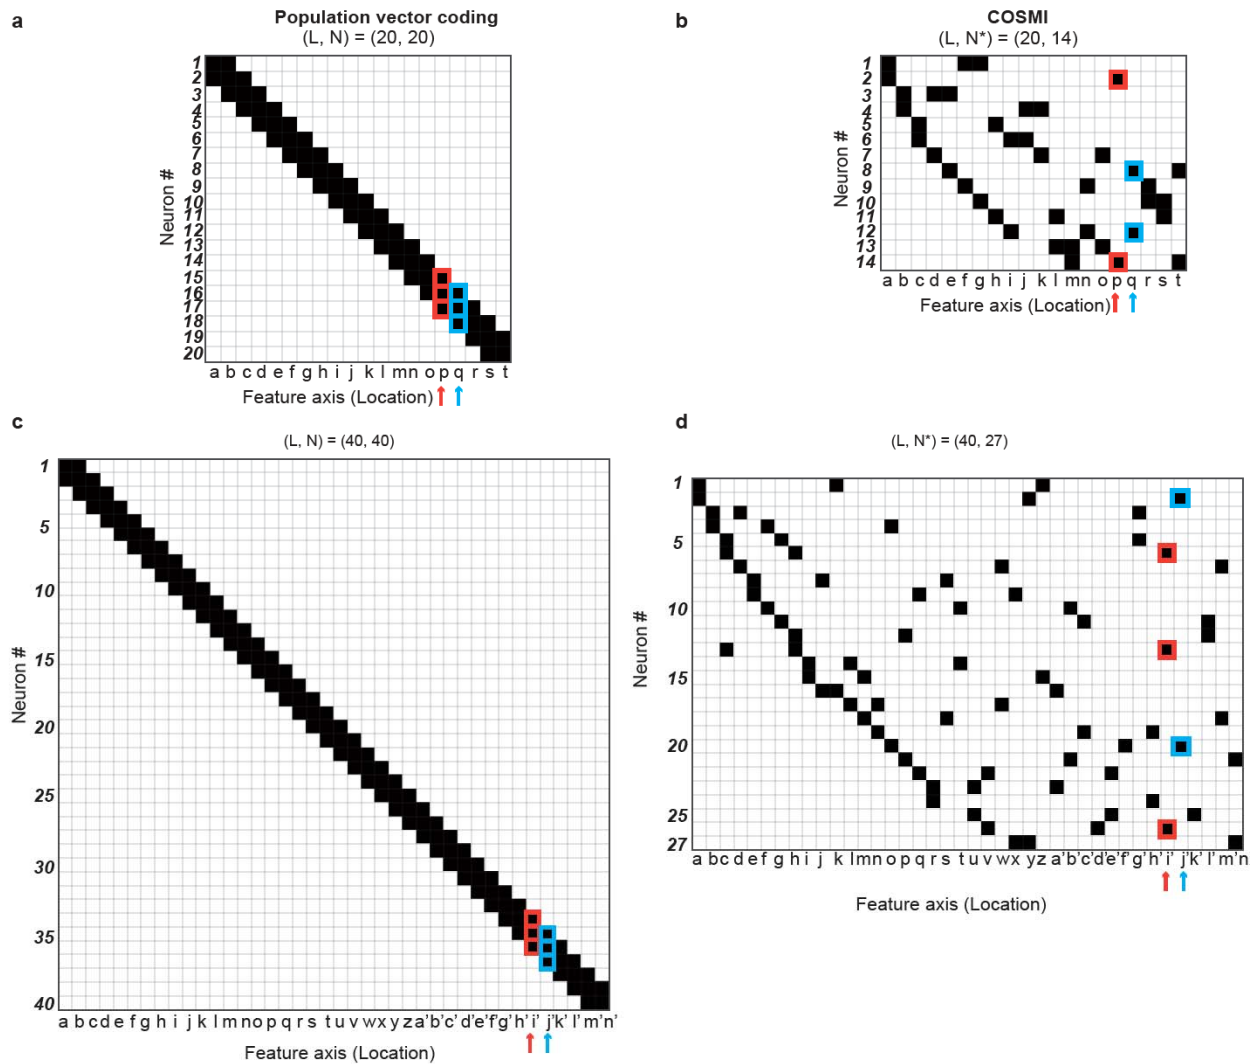

1238

1239 **Fig. 6. Conceptual differences between traditional population vector coding of space versus**

1240 **COSMI coding of space. Related to Fig. 4. (a)** Population vector coding. Schematic illustration

1241 (heat map) of the RFs of 20 single-lobed neurons with overlapping RFs, encoding 20 feature

1242 values (say, locations). Neurons are numbered from 1 to 20 (rows), locations are denoted by

1243 alphabets (a to t; columns). Black indicates the locations at which each neuron is active. The RF

1244 of a given neuron (row) can be read out by looking at the black pixels along that row; the

1245 neurons activated by a stimulus at a particular location (column) can be read out by looking at

1246 the black pixels along that column. It is evident that each stimulus at a particular location

1247 (column) is encoded by a functionally ‘local’ group of neurons from the ordered set. For  
1248 instance, stimulus at location p (indicated by red arrow) is encoded by neurons 15, 16, and 17  
1249 (indicated in red). Stated equivalently, each neuron encodes only for nearby locations (for  
1250 instance, row #8). In addition, stimuli at ‘nearby’ locations (for instance, p and q, indicated by  
1251 red and blue arrows, respectively) are always encoded by ‘nearby’ neurons (15,16,17; and  
1252 16,17,18, respectively). These features hold true in this canonical ordering of the neurons, in  
1253 which the RFs cover systematically locations (feature-values) from one end to the other in space  
1254 (feature space), and this canonical ordering is always possible for such single lobed RFs. **(b)**  
1255 COSMI. Schematic illustration of an optimal model solution (i.e., RFs of inhibitory neurons with  
1256 optimized overlap; see Fig. 4 and text) that achieve location-invariant selection for  $L=20$   
1257 locations with  $N^*=14$  neurons (see text surrounding Fig. 4). Conventions as in (a). It is evident  
1258 that not every stimulus location (column) can be encoded by a functionally ‘local’ group of  
1259 neurons from the set. For instance, stimulus at location p (indicated by red arrow) is encoded by  
1260 distant neurons 2 and 14 (indicated in red). Stated equivalently, each neuron does not only  
1261 encode for nearby locations, rather, it can encode for arbitrarily distant ones (for instance, row  
1262 #8). In addition, ‘nearby’ locations cannot always be encoded by ‘nearby’ neurons. For instance,  
1263 p and q, indicated by red and blue arrows, respectively, are encoded by widely distributed  
1264 neurons across the population (2,14; and 8,12, respectively). These features are illustrated here  
1265 for one particular ordering of the neurons: in order to facilitate comparison with (a), neurons  
1266 have been numbered such that lower numbers correspond to neurons for which at least one RF  
1267 lobe occurs earlier than the RF lobes of neurons with a higher number. However, these features  
1268 hold true no matter the ordering of the neurons, in other words, there is no ordering of the  
1269 neurons such that ‘nearby’ feature values are encoded only by ‘nearby’ neurons (see also Fig. 5e,

1270 and signature property #3 – Figs. 4 and 5). (Note: in A, the maximum number of pixels in a  
1271 neuron's RF was chosen to be 3, to match the maximum number of lobes in the RFs of multilobe  
1272 neurons in B.) **(c)** Another illustration of population vector coding using overlapping single-  
1273 lobed RFs, but with 40 locations and 40 neurons; conventions as in A. **(d)** Another illustration of  
1274 COSMI with an optimal model solution using overlapping multi-lobed RFs, but with 40  
1275 locations and 27 neurons ( $N^*=27$  neurons for  $L=40$  locations; see Fig. 4 and text). Conventions  
1276 as in (b).
